# Supplementary material for: Mechanism of CO2 in promoting the hydrogenation of levulinic acid to γ-valerolactone catalyzed by RuCl3 in aqueous solution
Source: Royal Society of Chemistry journal article supplement (doi:10.1039/d4cp00753k), 2024-01-01
Supplement: d4cp00753k2.pdf [file d4cp00753k2.pdf]

## Supporting Information

### Promotive Mechanism of CO<sub>2</sub> on the Hydrogenation of Levulinic Acid into $\gamma$ -Valerolactone Catalyzed by RuCl<sub>3</sub> in Aqueous Solution

Han-Yun Min<sup>a</sup>, Jin-Shan Xiong<sup>a</sup>, Ting-Hao Liu<sup>a</sup>, Shuai Fu<sup>a</sup>, Chang-Wei Hu<sup>b</sup>, Hua-Qing Yang<sup>a\*</sup>

<sup>a</sup>College of Chemical Engineering, Sichuan University, Chengdu, Sichuan, 610065, P.R. China

<sup>b</sup>Key Laboratory of Green Chemistry and Technology, Ministry of Education, College of Chemistry, Sichuan University, Chengdu, Sichuan, 610064, P.R. China

\*Correspondence to:

H.-Q. Yang; e-mail: [huaqingyang@scu.edu.cn](mailto:huaqingyang@scu.edu.cn);

Fax: 86 28 85464466;

Telephone: 86 28 85464466

---

## Catalogue

- (1). **Figure S1** The geometric structures (a), the relative energy ( $E_r$ , kJ mol<sup>-1</sup>) (b) and the formed Gibbs free energies ( $G_r$ , kJ mol<sup>-1</sup>) (c) for  $^x[\text{Ru}(\text{H}_2\text{O})_n]^{3+}$  ( $n=0-6$ ) complexes as function of the number of coordinating H<sub>2</sub>O molecules ( $n$ ) relative to the dissociated  $^6\text{Ru}^{3+}$  cation and H<sub>2</sub>O in aqueous solution .....1
- (2). **Figure S2** The optimized geometric structures, the Gibbs free energies ( $G_r$ , kJ mol<sup>-1</sup>) relative to the dissociated  $^6\text{Ru}^{3+}$  cation and ligand, and the charge of natural bond orbital (NBO) of Ru-site in  $^6[\text{Ru}(\text{H}_2\text{O})]^{3+}$ ,  $^6[\text{Ru}(\text{PPh}_3)]^{3+}$ ,  $^6[\text{Ru}(\text{NEt}_3)]^{3+}$  and  $^6[\text{Ru}(\text{PY})]^{3+}$  complexes in aqueous solution. ....2
- (3). **Figure S3** The geometric structures (a) and the schematic energy diagrams (b) with the relative Gibbs free energy ( $G_r$ , kJ mol<sup>-1</sup>) for the background reaction of the hydrogenation of LA to GVL, OT and MFD with H<sub>2</sub> as H-source. For clarity, hydrogen atoms on carbon are not shown. Bond lengths are reported in Å.....3
- (4). **Figure S4** The geometric structures (a) and the schematic energy diagrams (b) with the relative Gibbs free energy ( $G_r$ , kJ mol<sup>-1</sup>) for the background reaction of the hydrogenation of LA to GVL, OT and MFD with HCOOH as H-source. For clarity, hydrogen atoms on carbon are not shown. Bond lengths are reported in Å. ....4
- (5). **Figure S5** The geometric structures (a) and the schematic energy diagrams (b) with the relative Gibbs free energy ( $G_r$ , kJ mol<sup>-1</sup>) for the background of LA + HCOOH → GVL + H<sub>2</sub>O + CO<sub>2</sub> through hydrogenation of ketone carbonyl in the presence of NEt<sub>3</sub> ligand. For clarity, hydrogen atoms on carbon are not shown. Bond lengths are reported in Å. ....5
- (6). **Figure S6** The geometric structures (a) and the schematic energy diagrams (b) with the relative Gibbs free energy ( $G_r$ , kJ mol<sup>-1</sup>) for the background reactions of LA + HCOOH → OT + H<sub>2</sub>O + CO<sub>2</sub> and LA + HCOOH → MFD + CO<sub>2</sub> through hydrogenation of carboxyl carbonyl in the presence of NEt<sub>3</sub> ligand. For clarity, hydrogen atoms on carbon are not shown. Bond lengths are reported in Å.....6
- (7). **Figure S7** The geometric structures (a) and the schematic energy diagrams (b) with the relative Gibbs free energy ( $G_r$ , kJ mol<sup>-1</sup>) for the reaction stage of  $^6[\text{Ru}(\text{PPh}_3)]^{3+} + \text{HCOO}^- + \text{LA} \rightarrow ^6[3\text{-F-K-IM5}]^{2+} + \text{CO}_2 + \text{PPh}_3$  through hydrogenation of ketone carbonyl. For clarity, hydrogen atoms on carbon are not shown. Bond lengths reported in Å. ....7
- (8). **Figure S8.** The geometric structures (a) and the schematic energy diagrams (b) with the relative Gibbs free energy ( $G_r$ , kJ mol<sup>-1</sup>) for the reaction stage of  $^6[\text{Ru}(\text{PPh}_3)]^{3+} + \text{HCOO}^- + \text{LA} \rightarrow ^6[6\text{-F-O-IM5}]^{2+} + \text{CO}_2 + \text{PPh}_3$  through hydrogenation of carboxyl carbonyl. For clarity, hydrogen atoms on carbon are not shown. Bond lengths reported in Å. ....8
- (9). **Figure S9.** The geometric structures (a) and the schematic energy diagrams (b) with the relative Gibbs free energy ( $G_r$ , kJ mol<sup>-1</sup>) for the reaction stage of  $\text{HCOO}^- + \text{LA} \rightarrow \text{GVL} + \text{HCO}_3^-$ . For clarity, hydrogen atoms on carbon are not shown. Bond lengths reported in Å. ....9
- (10). **Figure S10.** Arrhenius plots of rate constants for the selective control step for the reaction stage of  $^6[\text{Ru}(\text{PPh}_3)]^{3+} + \text{HCOOH} + \text{NEt}_3 \rightarrow ^6[\text{RuH}]^{2+} + [\text{HNEt}_3]^+ + \text{PPh}_3 + \text{CO}_2$  in aqueous solution. ....11
- (11). **Figure S11.** Arrhenius plots of rate constants for the selective control step for the reaction stage of  $^6[\text{Ru}(\text{PPh}_3)]^{3+} + \text{H}_2 + \text{NEt}_3 \rightarrow ^6[\text{RuH}]^{2+} + [\text{HNEt}_3]^+ + \text{PPh}_3$  in aqueous solution. ....12

- (12). **Table S1.** The reaction rate comparison of  ${}^6[\text{Ru}(\text{PPh}_3)]^{3+} + \text{HCOOH} + \text{NEt}_3 \rightarrow {}^6[\text{RuH}]^{2+} + [\text{HNEt}_3]^+ + \text{PPh}_3 + \text{CO}_2$  and  ${}^6[\text{Ru}(\text{PPh}_3)]^{3+} + \text{H}_2 + \text{NEt}_3 \rightarrow {}^6[\text{RuH}]^{2+} + [\text{HNEt}_3]^+ + \text{PPh}_3$  under the temperature range of 403 – 443 K. ....13
- (13). **Figure S12.** Arrhenius plots of rate constants for the selective control step for the reaction stage of  ${}^6[6\text{-F-O-IM5}]^{2+} + [\text{HNEt}_3]^+ + \text{PPh}_3 \rightarrow \text{OT} + {}^6[\text{Ru}(\text{PPh}_3)]^{3+} + \text{H}_2\text{O} + \text{NEt}_3$  in aqueous solution. ....14
- (14). **Figure S13.** Arrhenius plots of rate constants for the selective control step for the reaction stage of  ${}^6[6\text{-F-O-IM5}]^{2+} + [\text{HNEt}_3]^+ + \text{PPh}_3 \rightarrow \text{MFD} + {}^6[\text{Ru}(\text{PPh}_3)]^{3+} + \text{NEt}_3$  in aqueous solution .....15
- (15). **Table S2.** The reaction rate comparison of  ${}^6[6\text{-F-O-IM5}]^{2+} + [\text{HNEt}_3]^+ + \text{PPh}_3 \rightarrow \text{OT} + {}^6[\text{Ru}(\text{PPh}_3)]^{3+} + \text{H}_2\text{O} + \text{NEt}_3$  and  ${}^6[6\text{-F-O-IM5}]^{2+} + [\text{HNEt}_3]^+ + \text{PPh}_3 \rightarrow \text{MFD} + {}^6[\text{Ru}(\text{PPh}_3)]^{3+} + \text{NEt}_3$  under the temperature range of 403 – 443 K. ....16
- (16). **Figure S14.** Arrhenius plots of rate constants for the selective control step of  ${}^6[\text{RuH}]^{2+} + \text{LA} \rightarrow {}^6[3\text{-F-K-TS2}]^{2+}$  in aqueous solution. ....17
- (17). **Figure S15.** Arrhenius plots of rate constants for the selective control step for the reaction stage of  ${}^6[\text{RuH}]^{2+} + \text{LA} \rightarrow {}^6[6\text{-F-O-TS2}]^{2+}$  in aqueous solution. ....18
- (18). **Table S3.** The reaction rate comparison of  ${}^6[\text{RuH}]^{2+} + \text{LA} \rightarrow {}^6[3\text{-F-K-TS2}]^{2+}$  and  ${}^6[\text{RuH}]^{2+} + \text{LA} \rightarrow {}^6[6\text{-F-O-TS2}]^{2+}$  under the temperature range of 403 – 443 K. ....19
- (19). **Table S4.** Zero-point energies (*ZPE*, hartree), thermal correction to Gibbs free energy ( $G_0$ , hartree), total energies ( $E_c$ , hartree) corrected by *ZPE*, sum of electronic and thermal free energies ( $G_c$ , hartree) with *ZPE* and thermal corrections, and relative energies ( $E_r$ , kJ mol<sup>-1</sup>) and relative Gibbs free energies ( $G_r$ , kJ mol<sup>-1</sup>) relative to  ${}^6\text{Ru}^{3+}$  and  $\text{H}_2\text{O}$  for  ${}^x[\text{Ru}(\text{H}_2\text{O})_n]^{3+}$  ( $n = 0\text{-}6$ ) at M06/def2TZVP, 6-311++G(d,p) level in aqueous solution. ....20
- (20). **Table S5.** Zero-point energies (*ZPE*, hartree), thermal correction to Gibbs free energy ( $G_0$ , hartree), total energies ( $E_c$ , hartree) corrected by *ZPE*, sum of electronic and thermal free energies ( $G_c$ , hartree) with *ZPE* and thermal corrections, and relative energies ( $E_r$ , kJ mol<sup>-1</sup>) and relative Gibbs free energies ( $G_r$ , kJ mol<sup>-1</sup>) relative to  ${}^6\text{Ru}^{3+}$ ,  $\text{PPh}_3$ ,  $\text{NEt}_3$  and  $\text{PY}$  for  ${}^6[\text{Ru}(\text{H}_2\text{O})]^{3+}$ ,  ${}^6[\text{Ru}(\text{PPh}_3)]^{3+}$ ,  ${}^6[\text{Ru}(\text{NEt}_3)]^{3+}$  and  ${}^6[\text{Ru}(\text{PY})]^{3+}$  complexes at M06/def2TZVP, 6-311++G(d,p) level in aqueous solution. ....21
- (21). **Table S6.** Zero-point energies (*ZPE*, hartree), thermal correction to Gibbs free energy ( $G_0$ , hartree), total energies ( $E_c$ , hartree) corrected by *ZPE*, sum of electronic and thermal free energies ( $G_c$ , hartree) with *ZPE* and thermal corrections, and relative energies ( $E_r$ , kJ mol<sup>-1</sup>) and relative Gibbs free energies ( $G_r$ , kJ mol<sup>-1</sup>) relative to the reactants for hydrogenation of LA to GVL, OT and MFD with  $\text{H}_2$  as H-source at M06/def2TZVP, 6-311++G(d,p) level in aqueous solution. ....22
- (22). **Table S7.** Zero-point energies (*ZPE*, hartree), thermal correction to Gibbs free energy ( $G_0$ , hartree), total energies ( $E_c$ , hartree) corrected by *ZPE*, sum of electronic and thermal free energies ( $G_c$ , hartree) with *ZPE* and thermal corrections, and relative energies ( $E_r$ , kJ mol<sup>-1</sup>) and relative Gibbs free energies ( $G_r$ , kJ mol<sup>-1</sup>) relative to the reactants for hydrogenation of LA to GVL, OT and MFD with  $\text{HCOOH}$  as H-source at M06/def2TZVP, 6-311++G(d,p) level in aqueous solution. ....23

- (23). **Table S8.** Zero-point energies (*ZPE*, hartree), thermal correction to Gibbs free energy ( $G_0$ , hartree), total energies ( $E_c$ , hartree) corrected by *ZPE*, sum of electronic and thermal free energies ( $G_c$ , hartree) with *ZPE* and thermal corrections, and relative energies ( $E_r$ , kJ mol<sup>-1</sup>) and relative Gibbs free energies ( $G_r$ , kJ mol<sup>-1</sup>) relative to the reactants for the reaction of LA + HCOOH → GVL + H<sub>2</sub>O + CO<sub>2</sub> through hydrogenation of ketone carbonyl in the presence of NEt<sub>3</sub> ligand at M06/def2TZVP, 6-311++G(d,p) level in aqueous solution. ....24
- (24). **Table S9.** Zero-point energies (*ZPE*, hartree), thermal correction to Gibbs free energy ( $G_0$ , hartree), total energies ( $E_c$ , hartree) corrected by *ZPE*, sum of electronic and thermal free energies ( $G_c$ , hartree) with *ZPE* and thermal corrections, and relative energies ( $E_r$ , kJ mol<sup>-1</sup>) and relative Gibbs free energies ( $G_r$ , kJ mol<sup>-1</sup>) relative to the reactants for the reactions of LA + HCOOH → MFD + H<sub>2</sub>O + CO<sub>2</sub> and LA + HCOOH → OT + CO<sub>2</sub> through carboxyl carbonyl hydrogenation in the presence of NEt<sub>3</sub> ligand at M06/def2TZVP, 6-311++G(d,p) level in aqueous solution. ....25
- (25). **Table S10.** Zero-point energies (*ZPE*, hartree), thermal correction to Gibbs free energy ( $G_0$ , hartree), total energies ( $E_c$ , hartree) corrected by *ZPE*, sum of electronic and thermal free energies ( $G_c$ , hartree) with *ZPE* and thermal corrections, and relative energies ( $E_r$ , kJ mol<sup>-1</sup>) and relative Gibbs free energies ( $G_r$ , kJ mol<sup>-1</sup>) relative to the reactants for the reaction of <sup>6</sup>[Ru(PPh<sub>3</sub>)]<sup>3+</sup> + HCOO<sup>-</sup> + LA → <sup>6</sup>[3-F-K-IM5]<sup>2+</sup> + CO<sub>2</sub> + PPh<sub>3</sub> through hydrogenation of ketone carbonyl at M06/def2TZVP, 6-311++G(d,p) level in aqueous solution. ....26
- (26). **Table S11.** Zero-point energies (*ZPE*, hartree), thermal correction to Gibbs free energy ( $G_0$ , hartree), total energies ( $E_c$ , hartree) corrected by *ZPE*, sum of electronic and thermal free energies ( $G_c$ , hartree) with *ZPE* and thermal corrections, and relative energies ( $E_r$ , kJ mol<sup>-1</sup>) and relative Gibbs free energies ( $G_r$ , kJ mol<sup>-1</sup>) relative to the reactants for the reaction of <sup>6</sup>[Ru(PPh<sub>3</sub>)]<sup>3+</sup> + HCOO<sup>-</sup> + LA → <sup>6</sup>[6-F-O-IM5]<sup>2+</sup> + CO<sub>2</sub> + PPh<sub>3</sub> through hydrogenation of carboxyl carbonyl at M06/def2TZVP, 6-311++G(d,p) level in aqueous solution. ....27
- (27). **Table S12.** Zero-point energies (*ZPE*, hartree), thermal correction to Gibbs free energy ( $G_0$ , hartree), total energies ( $E_c$ , hartree) corrected by *ZPE*, sum of electronic and thermal free energies ( $G_c$ , hartree) with *ZPE* and thermal corrections, and relative energies ( $E_r$ , kJ mol<sup>-1</sup>) and relative Gibbs free energies ( $G_r$ , kJ mol<sup>-1</sup>) relative to the reactants for the reaction stage (i) of HCOOH + L → HCOO<sup>-</sup> + [HL]<sup>+</sup> (L= PPh<sub>3</sub>, NEt<sub>3</sub>, and PY) at M06/def2TZVP, 6-311++G(d,p) level in aqueous solution. ....28
- (28). **Table S13.** Zero-point energies (*ZPE*, hartree), thermal correction to Gibbs free energy ( $G_0$ , hartree), total energies ( $E_c$ , hartree) corrected by *ZPE*, sum of electronic and thermal free energies ( $G_c$ , hartree) with *ZPE* and thermal corrections, and relative energies ( $E_r$ , kJ mol<sup>-1</sup>) and relative Gibbs free energies ( $G_r$ , kJ mol<sup>-1</sup>) relative to the reactants for the reaction stage (ii) of HCOO<sup>-</sup> + <sup>6</sup>[Ru(PPh<sub>3</sub>)]<sup>3+</sup> → <sup>6</sup>[RuH]<sup>2+</sup> + PPh<sub>3</sub> + CO<sub>2</sub> at M06/def2TZVP, 6-311++G(d,p) level in aqueous solution. ....29
- (29). **Table S15.** Zero-point energies (*ZPE*, hartree), thermal correction to Gibbs free energy ( $G_0$ , hartree), total energies ( $E_c$ , hartree) corrected by *ZPE*, sum of electronic and thermal free energies ( $G_c$ , hartree) with *ZPE* and thermal corrections, and relative energies ( $E_r$ , kJ mol<sup>-1</sup>) and relative Gibbs free energies ( $G_r$ , kJ mol<sup>-1</sup>) relative to the reactants for the reaction stage (iv) of <sup>6</sup>[RuOH]<sup>2+</sup> + CO<sub>2</sub> + PPh<sub>3</sub> → <sup>6</sup>[Ru(PPh<sub>3</sub>)]<sup>3+</sup> + HCO<sub>3</sub><sup>-</sup> at M06/def2TZVP, 6-311++G(d,p) level in aqueous solution. ....31

- 
- (30). **Table S16.** Zero-point energies (*ZPE*, hartree), thermal correction to Gibbs free energy ( $G_0$ , hartree), total energies ( $E_c$ , hartree) corrected by *ZPE*, sum of electronic and thermal free energies ( $G_c$ , hartree) with *ZPE* and thermal corrections, and relative energies ( $E_r$ , kJ mol<sup>-1</sup>) and relative Gibbs free energies ( $G_r$ , kJ mol<sup>-1</sup>) relative to the reactants for the reaction stage (v) of  $\text{HCO}_3^- + [\text{HL}]^+ \rightarrow \text{L} + \text{CO}_2 + \text{H}_2\text{O}$  (L = PPh<sub>3</sub>, NEt<sub>3</sub>, and PY) at M06/def2TZVP, 6-311++G(d,p) level in aqueous solution. ....32
- (31). **Table S17.** Zero-point energies (*ZPE*, hartree), thermal correction to Gibbs free energy ( $G_0$ , hartree), total energies ( $E_c$ , hartree) corrected by *ZPE*, sum of electronic and thermal free energies ( $G_c$ , hartree) with *ZPE* and thermal corrections, and relative energies ( $E_r$ , kJ mol<sup>-1</sup>) and relative Gibbs free energies ( $G_r$ , kJ mol<sup>-1</sup>) relative to the reactants for the reaction stage (vi) of  ${}^6[\text{RuH}]^{2+} + \text{LA} \rightarrow {}^6[\text{RuOH}]^{2+} + \text{OT}$  through the hydrogenation of carboxyl carbonyl at M06/def2TZVP, 6-311++G(d,p) level in aqueous solution. ....33
- (32). **Table S18.** Zero-point energies (*ZPE*, hartree), thermal correction to Gibbs free energy ( $G_0$ , hartree), total energies ( $E_c$ , hartree) corrected by *ZPE*, sum of electronic and thermal free energies ( $G_c$ , hartree) with *ZPE* and thermal corrections, and relative energies ( $E_r$ , kJ mol<sup>-1</sup>) and relative Gibbs free energies ( $G_r$ , kJ mol<sup>-1</sup>) relative to the reactants for the reaction stage (vii) of  ${}^6[\text{RuH}]^{2+} + \text{LA} + [\text{HNEt}_3]^+ + \text{PPh}_3 \rightarrow {}^6[\text{Ru}(\text{PPh}_3)]^{3+} + \text{NEt}_3 + \text{MFD}$  through the hydrogenation of carboxyl carbonyl at M06/def2TZVP, 6-311++G(d,p) level in aqueous solution. ....34
- (33). **Table S19.** Zero-point energies (*ZPE*, hartree), thermal correction to Gibbs free energy ( $G_0$ , hartree), total energies ( $E_c$ , hartree) corrected by *ZPE*, sum of electronic and thermal free energies ( $G_c$ , hartree) with *ZPE* and thermal corrections, and relative energies ( $E_r$ , kJ mol<sup>-1</sup>) and relative Gibbs free energies ( $G_r$ , kJ mol<sup>-1</sup>) relative to the reactants for the reaction stage (viii) of  ${}^6[\text{Ru}(\text{PPh}_3)]^{3+} + \text{H}_2 + \text{L} \rightarrow {}^6[\text{RuH}]^{2+} + [\text{HL}]^+ + \text{PPh}_3$  (L = PPh<sub>3</sub>, NEt<sub>3</sub>, and PY) and  ${}^6[\text{Ru}(\text{PPh}_3)]^{3+} + \text{H}_2 \rightarrow {}^6[\text{Ru}(\text{H})_2]^{3+} + \text{PPh}_3$  at M06/def2TZVP, 6-311++G(d,p) level in aqueous solution. ....35
- (34). **Table S20.** Zero-point energies (*ZPE*, hartree), thermal correction to Gibbs free energy ( $G_0$ , hartree), total energies ( $E_c$ , hartree) corrected by *ZPE*, sum of electronic and thermal free energies ( $G_c$ , hartree) with *ZPE* and thermal corrections, and relative energies ( $E_r$ , kJ mol<sup>-1</sup>) and relative Gibbs free energies ( $G_r$ , kJ mol<sup>-1</sup>) relative to the reactants for the reaction stage of  $\text{HCOO}^- + \text{LA} \rightarrow \text{GVL} + \text{HCO}_3^-$  in presence of PPh<sub>3</sub> at M06/def2TZVP, 6-311++G(d,p) level in aqueous solution. ....36

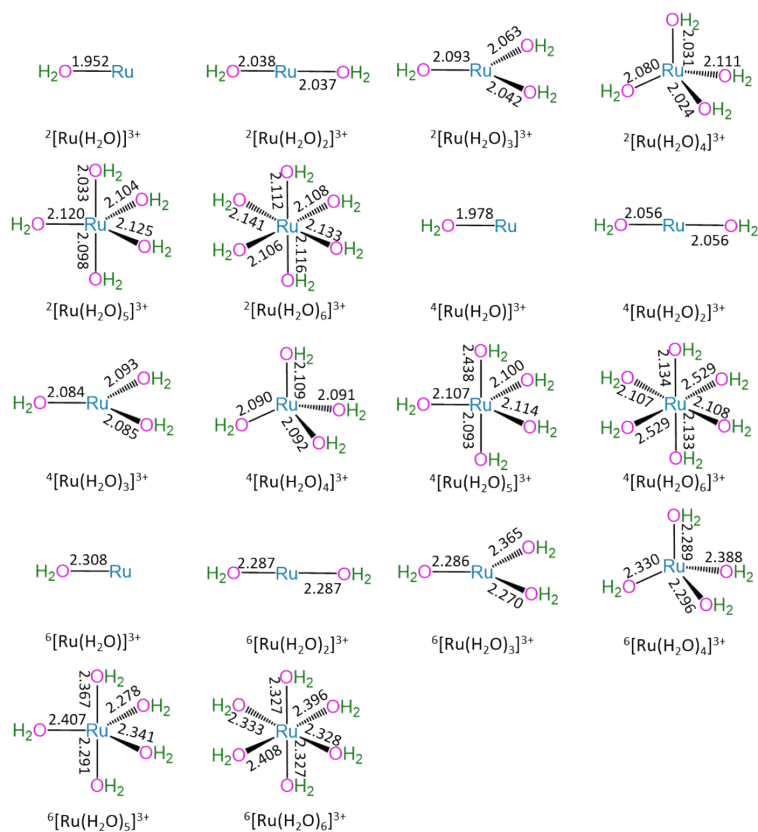

(a)

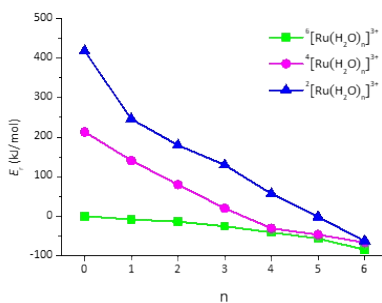

(b)

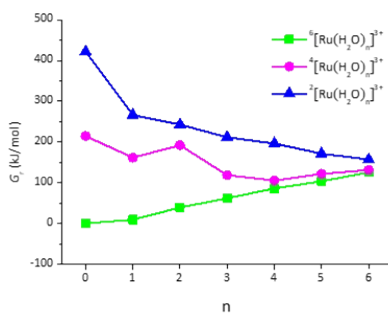

(c)

**Figure S1** The geometric structures (a), the relative energy ( $E_r$ , kJ mol<sup>-1</sup>) (b) and the formed Gibbs free energies ( $G_r$ , kJ mol<sup>-1</sup>) (c) for  $^x[\text{Ru}(\text{H}_2\text{O})_n]^{3+}$  ( $n=0-6$ ) complexes as function of the number of coordinating H<sub>2</sub>O molecules ( $n$ ) relative to the dissociated  $^6\text{Ru}^{3+}$  cation and H<sub>2</sub>O in aqueous solution

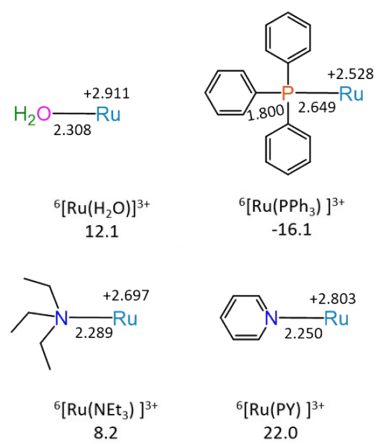

**Figure S2** The optimized geometric structures, the Gibbs free energies ( $G_r$ , kJ mol<sup>-1</sup>) relative to the dissociated  ${}^6\text{Ru}^{3+}$  cation and ligand, and the charge of natural bond orbital (NBO) of Ru-site in  ${}^6[\text{Ru}(\text{H}_2\text{O})]^{3+}$ ,  ${}^6[\text{Ru}(\text{PPh}_3)]^{3+}$ ,  ${}^6[\text{Ru}(\text{NEt}_3)]^{3+}$  and  ${}^6[\text{Ru}(\text{PY})]^{3+}$  complexes in aqueous solution.

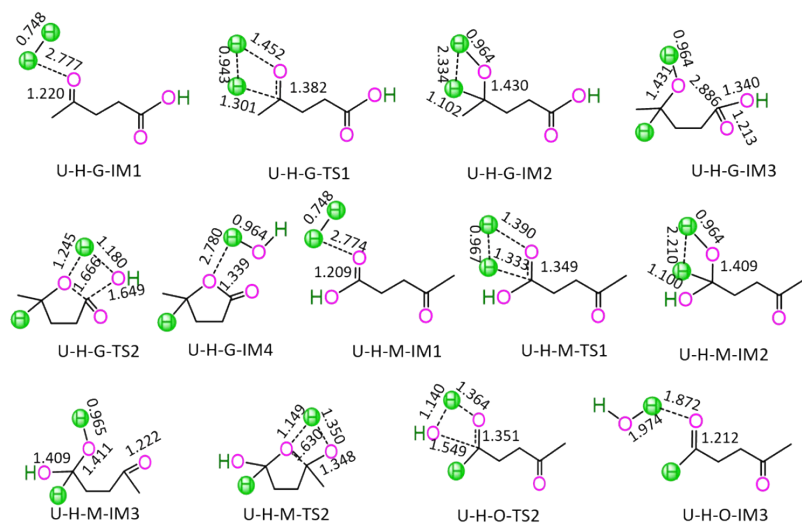

(a)

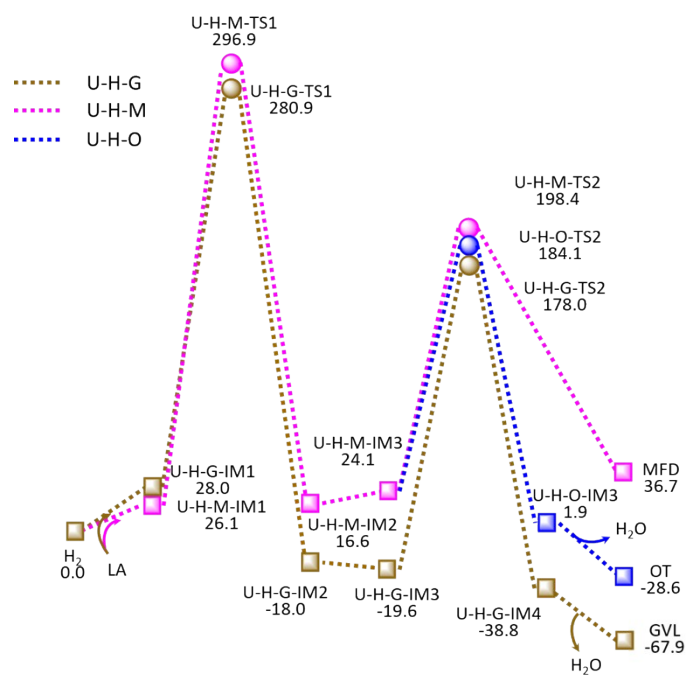

(b)

**Figure S3** The geometric structures (a) and the schematic energy diagrams (b) with the relative Gibbs free energy ( $G_r$ ,  $\text{kJ mol}^{-1}$ ) for the background reaction of the hydrogenation of LA to GVL, OT and MFD with  $\text{H}_2$  as H-source. For clarity, hydrogen atoms on carbon are not shown. Bond lengths are reported in Å.



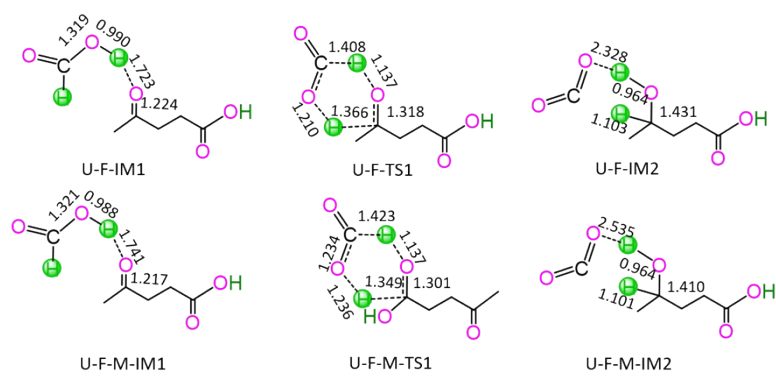

(a)

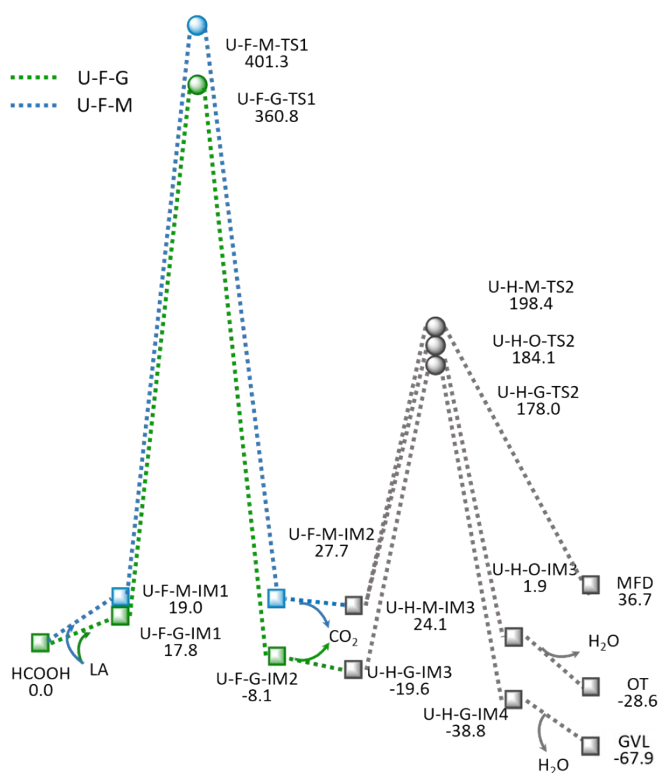

(b)

**Figure S4** The geometric structures (a) and the schematic energy diagrams (b) with the relative Gibbs free energy ( $G_r$ ,  $\text{kJ mol}^{-1}$ ) for the background reaction of the hydrogenation of LA to GVL, OT and MFD with HCOOH as H-source. For clarity, hydrogen atoms on carbon are not shown. Bond lengths are reported in Å.

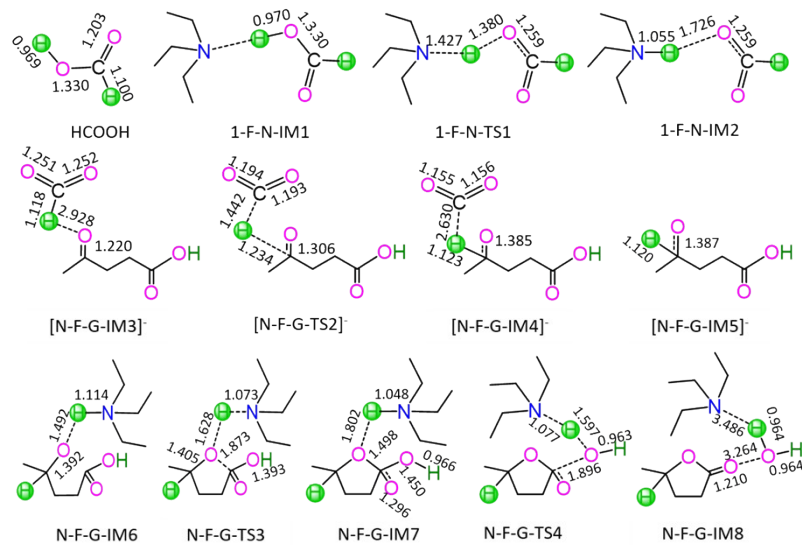

(a)

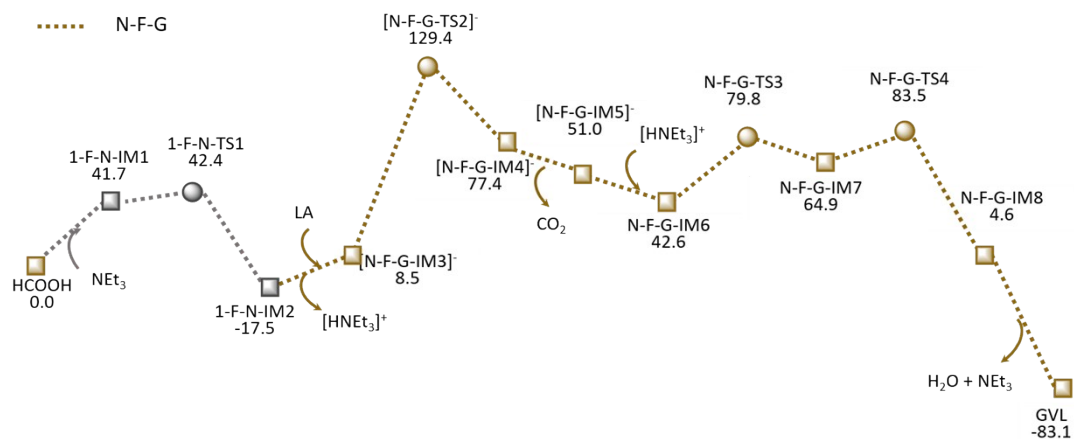

(b)

**Figure S5** The geometric structures (a) and the schematic energy diagrams (b) with the relative Gibbs free energy ( $G_r$ , kJ mol<sup>-1</sup>) for the background of LA + HCOOH → GVL + H<sub>2</sub>O + CO<sub>2</sub> through hydrogenation of ketone carbonyl in the presence of NEt<sub>3</sub> ligand. For clarity, hydrogen atoms on carbon are not shown. Bond lengths are reported in Å.

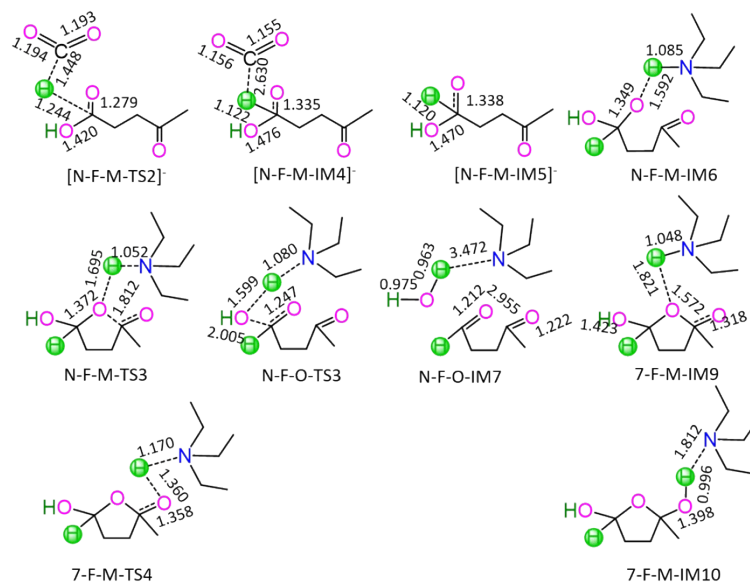

(a)

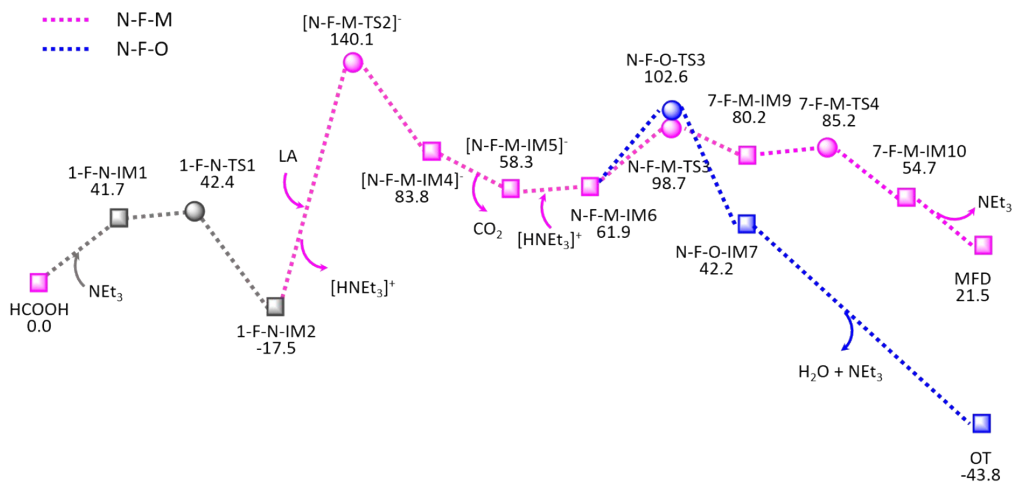

(b)

**Figure S6** The geometric structures (a) and the schematic energy diagrams (b) with the relative Gibbs free energy ( $G_r$ ,  $\text{kJ mol}^{-1}$ ) for the background reactions of  $\text{LA} + \text{HCOOH} \rightarrow \text{OT} + \text{H}_2\text{O} + \text{CO}_2$  and  $\text{LA} + \text{HCOOH} \rightarrow \text{MFD} + \text{CO}_2$  through hydrogenation of carboxyl carbonyl in the presence of  $\text{NEt}_3$  ligand. For clarity, hydrogen atoms on carbon are not shown. Bond lengths are reported in Å.

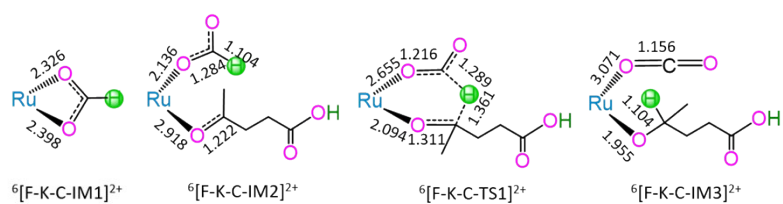

(a)

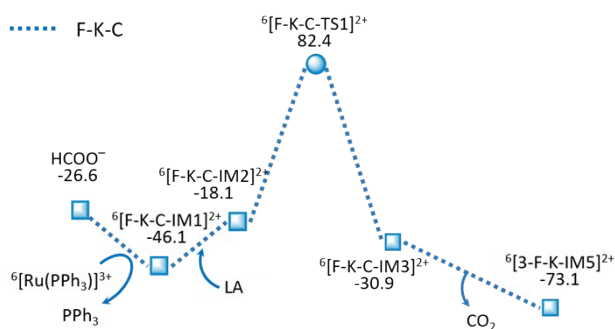

(b)

**Figure S7** The geometric structures (a) and the schematic energy diagrams (b) with the relative Gibbs free energy ( $G_r$ ,  $\text{kJ mol}^{-1}$ ) for the reaction stage of  ${}^6[\text{Ru}(\text{PPh}_3)_3]^{3+} + \text{HCOO}^- + \text{LA} \rightarrow {}^6[3\text{-F-K-IM5}]^{2+} + \text{CO}_2 + \text{PPh}_3$  through hydrogenation of ketone carbonyl. For clarity, hydrogen atoms on carbon are not shown. Bond lengths reported in Å.

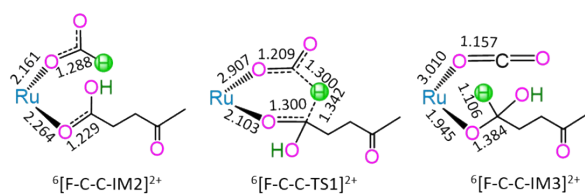

(a)

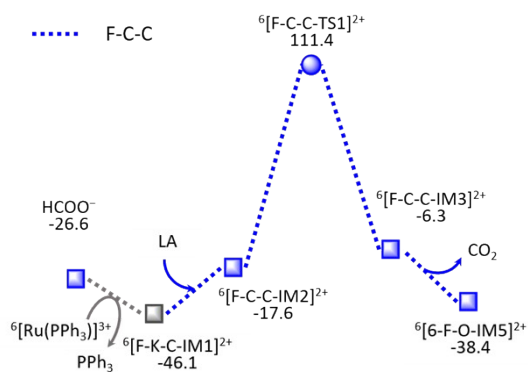

(b)

**Figure S8.** The geometric structures (a) and the schematic energy diagrams (b) with the relative Gibbs free energy ( $G_r$ ,  $\text{kJ mol}^{-1}$ ) for the reaction stage of  ${}^6[\text{Ru}(\text{PPh}_3)]^{3+} + \text{HCOO}^- + \text{LA} \rightarrow {}^6[6\text{-F-O-IM5}]^{2+} + \text{CO}_2 + \text{PPh}_3$  through hydrogenation of carboxyl carbonyl. For clarity, hydrogen atoms on carbon are not shown. Bond lengths reported in  $\text{\AA}$ .

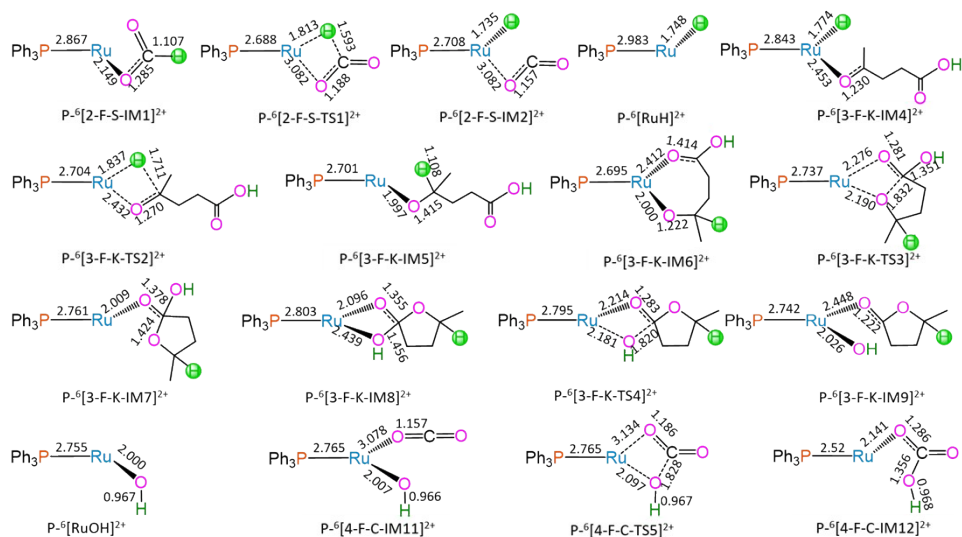

(a)

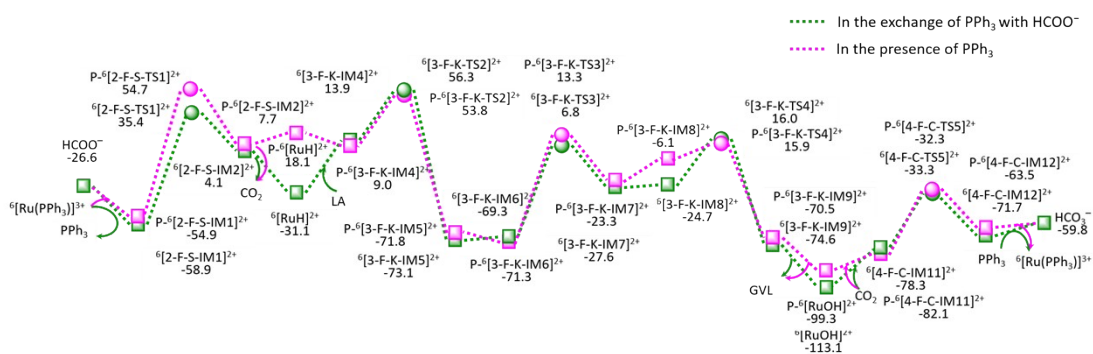

(b)

**Figure S9.** The geometric structures (a) and the schematic energy diagrams (b) with the relative Gibbs free energy ( $G_r$ ,  $\text{kJ mol}^{-1}$ ) for the reaction stage of  $\text{HCOO}^- + \text{LA} \rightarrow \text{GVL} + \text{HCO}_3^-$ . For clarity, hydrogen atoms on carbon are not shown. Bond lengths reported in Å.

---

**NOTES: Evaluation of rate constants:**

The rate constants  $k(T)$  were evaluated according to conventional transition state theory  $k'(T)$ , including the tunneling correction  $\kappa(T)$  based on Wigner's formulation as follows:<sup>1</sup>

$$k' = \frac{k_B T}{h c^0} \cdot e^{-\frac{\Delta G^\ddagger}{RT}}$$

$$\kappa(T) = 1 + \frac{1}{24} \left| \frac{\omega^\ddagger h}{k_B T} \right|^2$$

$$k = \kappa(T) \times k'$$

$$\ln k = -\frac{E_a}{RT} + \ln A$$

$$k = A \cdot e^{-\frac{E_a}{RT}}$$

where  $k_B$  is Boltzmann's constant,  $T$  is the absolute temperature,  $h$  is Planck's constant,  $c^0$  is the standard concentration ( $1 \text{ mol dm}^{-3}$ ),  $\Delta G^\ddagger$  is the activation Gibbs free energy barrier and  $\omega^\ddagger$  is the imaginary frequency of the TS.

**References:**

1. E. Wigner, *J. Chem. Phys.*, 1937, **5**, 720–723.

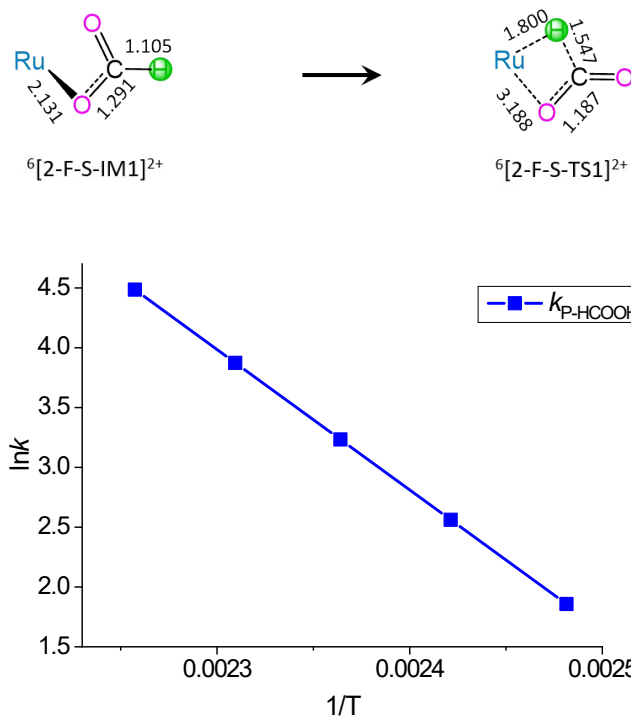

**Figure S10.** Arrhenius plots of rate constants for the selective control step for the reaction stage of  ${}^6[\text{Ru}(\text{PPh}_3)_3]^{3+} + \text{HCOOH} + \text{NEt}_3 \rightarrow {}^6[\text{RuH}]^{2+} + [\text{HNEt}_3]^+ + \text{PPh}_3 + \text{CO}_2$  in aqueous solution.



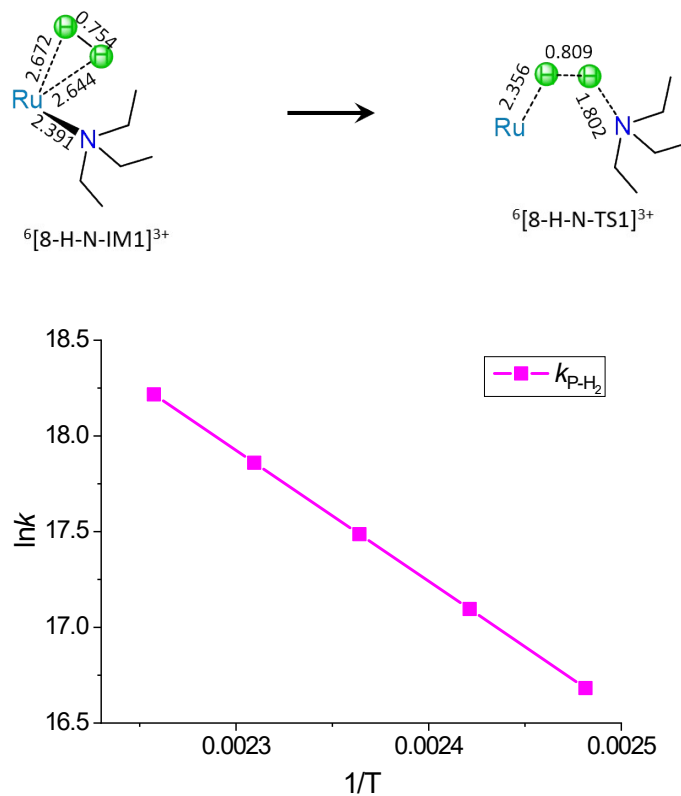

**Figure S11.** Arrhenius plots of rate constants for the selective control step for the reaction stage of  ${}^6[Ru(PPh_3)]^{3+} + H_2 + NEt_3 \rightarrow {}^6[RuH]^{2+} + [HNEt_3]^+ + PPh_3$  in aqueous solution.

**Table S1.** The reaction rate comparison of  ${}^6\text{[Ru(PPh}_3\text{)]}^{3+} + \text{HCOOH} + \text{NEt}_3 \rightarrow {}^6\text{[RuH]}^{2+} + [\text{HNEt}_3]^+ + \text{PPh}_3 + \text{CO}_2$  and  ${}^6\text{[Ru(PPh}_3\text{)]}^{3+} + \text{H}_2 + \text{NEt}_3 \rightarrow {}^6\text{[RuH]}^{2+} + [\text{HNEt}_3]^+ + \text{PPh}_3$  under the temperature range of 403 – 443 K.

| T /K | P-HCOOH                               | P-H <sub>2</sub>                      |                                       |
|------|---------------------------------------|---------------------------------------|---------------------------------------|
|      | $2.80 \times 10^{13} \exp(-97523/RT)$ | $4.17 \times 10^{14} \exp(-56892/RT)$ | $k_{\text{P-H}_2}/k_{\text{P-HCOOH}}$ |
| 403  | 6.4E+00                               | 1.8E+07                               | 2.8E+06                               |
| 413  | 1.3E+01                               | 2.7E+07                               | 2.1E+06                               |
| 423  | 2.5E+01                               | 3.9E+07                               | 1.6E+06                               |
| 433  | 4.8E+01                               | 5.7E+07                               | 1.2E+06                               |
| 443  | 8.9E+01                               | 8.2E+07                               | 9.2E+05                               |

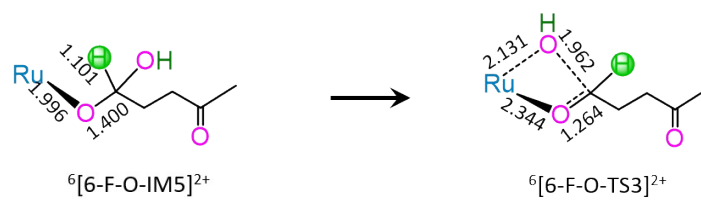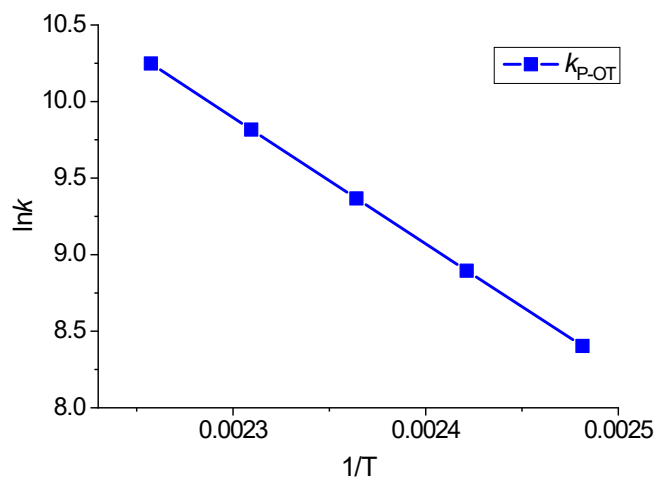

$$k_{\text{P-OT}} = 3.33 \times 10^{12} \exp(-68457/RT)$$

**Figure S12.** Arrhenius plots of rate constants for the selective control step for the reaction stage of  ${}^6[6\text{-F-O-IM5}]^{2+}$  +  $[\text{HNEt}_3]^+$  +  $\text{PPh}_3 \rightarrow \text{OT} + {}^6[\text{Ru}(\text{PPh}_3)]^{3+} + \text{H}_2\text{O} + \text{NEt}_3$  in aqueous solution.

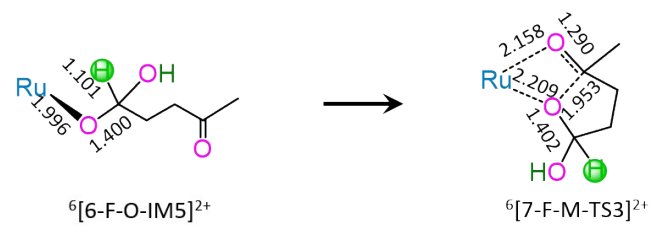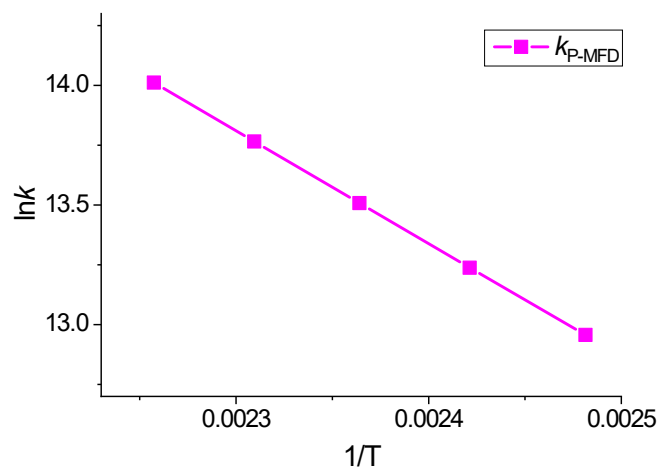

$$k_{\text{P-MFD}} = 5.00 \times 10^{10} \exp(-39136/RT)$$

**Figure S13.** Arrhenius plots of rate constants for the selective control step for the reaction stage of  ${}^6[6\text{-F-O-IM5}]^{2+}$  +  $[\text{HNEt}_3]^+$  +  $\text{PPh}_3 \rightarrow \text{MFD} + {}^6[\text{Ru}(\text{PPh}_3)]^{3+} + \text{NEt}_3$  in aqueous solution

**Table S2.** The reaction rate comparison of  ${}^6[6\text{-F-O-IM5}]^{2+} + [\text{HNEt}_3]^+ + \text{PPh}_3 \rightarrow \text{OT} + {}^6[\text{Ru}(\text{PPh}_3)]^{3+} + \text{H}_2\text{O} + \text{NEt}_3$  and  ${}^6[6\text{-F-O-IM5}]^{2+} + [\text{HNEt}_3]^+ + \text{PPh}_3 \rightarrow \text{MFD} + {}^6[\text{Ru}(\text{PPh}_3)]^{3+} + \text{NEt}_3$  under the temperature range of 403 – 443 K.

| T /K | P-OT                                  | P-MFD                                 |                                    | OT(%) | MFD(%) |
|------|---------------------------------------|---------------------------------------|------------------------------------|-------|--------|
|      | $3.33 \times 10^{12} \exp(-68457/RT)$ | $5.00 \times 10^{10} \exp(-39136/RT)$ | $k_{\text{P-MFD}}/k_{\text{P-OT}}$ |       |        |
| 403  | 4.5E+03                               | 2.5E+05                               | 9.5E+01                            | 1.0%  | 99.0%  |
| 413  | 7.3E+03                               | 4.8E+05                               | 7.7E+01                            | 1.3%  | 98.7%  |
| 423  | 1.2E+04                               | 8.8E+05                               | 6.3E+01                            | 1.6%  | 98.4%  |
| 433  | 1.8E+04                               | 1.6E+05                               | 5.2E+01                            | 1.9%  | 98.1%  |
| 443  | 2.8E+04                               | 2.7E+06                               | 4.3E+01                            | 2.3%  | 97.7%  |

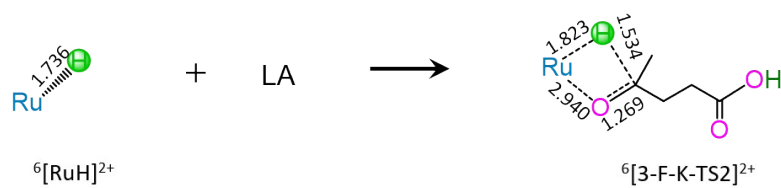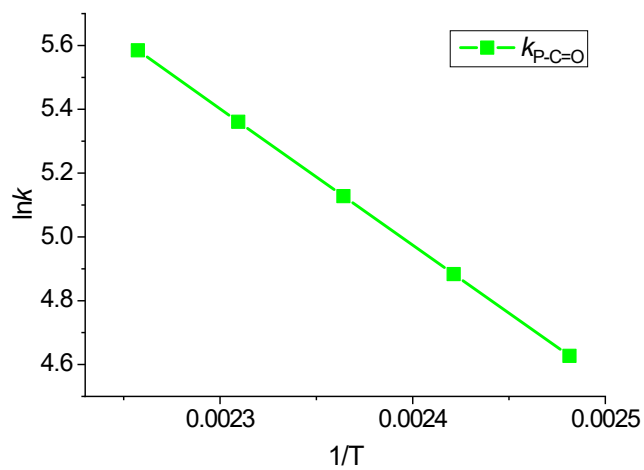

$$k_{p-C=O} = 4.12 \times 10^6 \exp(-35530/RT)$$

**Figure S14.** Arrhenius plots of rate constants for the selective control step of  ${}^6[\text{RuH}]^{2+} + \text{LA} \rightarrow {}^6[3\text{-F-K-TS2}]^{2+}$  in aqueous solution.

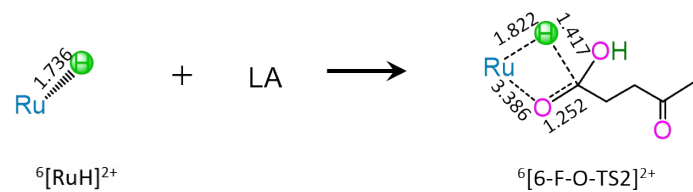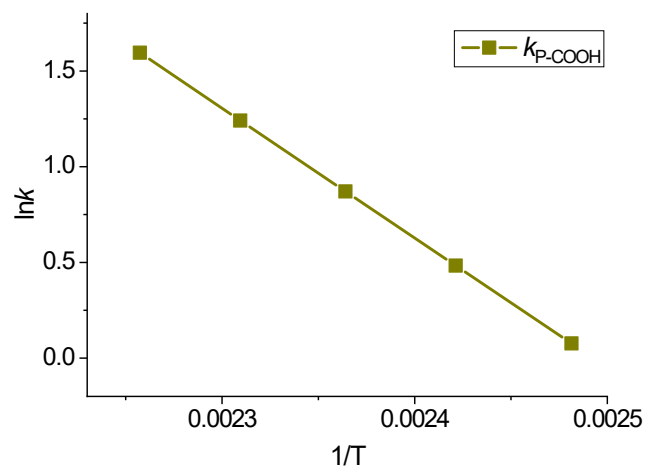

$$k_{\text{P-COOH}} = 2.17 \times 10^7 \exp(-56342/RT)$$

**Figure S15.** Arrhenius plots of rate constants for the selective control step for the reaction stage of  ${}^6[\text{RuH}]^{2+} + \text{LA} \rightarrow {}^6[\text{6-F-O-TS2}]^{2+}$  in aqueous solution.

**Table S3.** The reaction rate comparison of  ${}^6[\text{RuH}]^{2+} + \text{LA} \rightarrow {}^6[3\text{-F-K-TS2}]^{2+}$  and  ${}^6[\text{RuH}]^{2+} + \text{LA} \rightarrow {}^6[6\text{-F-O-TS2}]^{2+}$  under the temperature range of 403 – 443 K.

| T /K | P-C=O                              | P-COOH                             | $k_{\text{P-C=O}}/k_{\text{P-COOH}}$ | P-C=O(%) | P-COOH(%) |
|------|------------------------------------|------------------------------------|--------------------------------------|----------|-----------|
|      | $4.12 \times 10^6 \exp(-35530/RT)$ | $2.17 \times 10^7 \exp(-56342/RT)$ |                                      |          |           |
| 403  | 1.0E+02                            | 1.1E+00                            | 9.5E+01                              | 99.0%    | 1.0%      |
| 413  | 1.3E+02                            | 1.6E+00                            | 8.1E+01                              | 98.8%    | 1.2%      |
| 423  | 1.7E+02                            | 2.4E+00                            | 7.1E+01                              | 98.6%    | 1.4%      |
| 433  | 2.1E+02                            | 3.5E+00                            | 6.2E+01                              | 98.4%    | 1.6%      |
| 443  | 2.7E+02                            | 4.9E+00                            | 5.4E+01                              | 98.2%    | 1.8%      |



**Table S4.** Zero-point energies ( $ZPE$ , hartree), thermal correction to Gibbs free energy ( $G_0$ , hartree), total energies ( $E_c$ , hartree) corrected by  $ZPE$ , sum of electronic and thermal free energies ( $G_c$ , hartree) with  $ZPE$  and thermal corrections, and relative energies ( $E_r$ , kJ mol<sup>-1</sup>) and relative Gibbs free energies ( $G_r$ , kJ mol<sup>-1</sup>) relative to <sup>6</sup>Ru<sup>3+</sup> and H<sub>2</sub>O for <sup>x</sup>[Ru(H<sub>2</sub>O)<sub>n</sub>]<sup>3+</sup> (n = 0-6) at M06/def2TZVP, 6-311++G(d,p) level in aqueous solution.

| Species                                                                              | $ZPE$   | $E_c$      | $G_0$    | $G_c$      | $E_r$ | $G_r$ |
|--------------------------------------------------------------------------------------|---------|------------|----------|------------|-------|-------|
| <sup>6</sup> Ru <sup>3+</sup>                                                        | 0.00000 | -94.43419  | -0.02116 | -94.45535  |       |       |
| <sup>4</sup> Ru <sup>3+</sup>                                                        | 0.00000 | -94.35303  | -0.02062 | -94.37365  |       |       |
| <sup>2</sup> Ru <sup>3+</sup>                                                        | 0.00000 | -94.27499  | -0.01969 | -94.29468  |       |       |
| H <sub>2</sub> O                                                                     | 0.02128 | -76.41073  | -0.00070 | -76.43271  |       |       |
| <sup>6</sup> Ru <sup>3+</sup>                                                        | 0.00000 | -94.43419  | -0.02116 | -94.45535  |       |       |
| <sup>6</sup> Ru <sup>3+</sup> + 6*H <sub>2</sub> O                                   | 0.12767 | -552.89858 | -0.02535 | -553.05161 | 0.0   | 0.0   |
| <sup>6</sup> [Ru(H <sub>2</sub> O)] <sup>3+</sup>                                    | 0.02407 | -170.84812 | -0.01128 | -170.88347 |       |       |
| <sup>6</sup> [Ru(H <sub>2</sub> O)] <sup>3+</sup> + 5*H <sub>2</sub> O               | 0.13047 | -552.90178 | -0.01477 | -553.04701 | -8.4  | 12.1  |
| <sup>6</sup> [Ru(H <sub>2</sub> O) <sub>2</sub> ] <sup>3+</sup>                      | 0.04943 | -247.26098 | 0.00763  | -247.30279 |       |       |
| <sup>6</sup> [Ru(H <sub>2</sub> O) <sub>2</sub> ] <sup>3+</sup> + 4*H <sub>2</sub> O | 0.13455 | -552.90392 | 0.00484  | -553.03363 | -14.0 | 47.2  |
| <sup>6</sup> [Ru(H <sub>2</sub> O) <sub>3</sub> ] <sup>3+</sup>                      | 0.07488 | -323.67609 | 0.02583  | -323.72514 |       |       |
| <sup>6</sup> [Ru(H <sub>2</sub> O) <sub>3</sub> ] <sup>3+</sup> + 3*H <sub>2</sub> O | 0.13872 | -552.90829 | 0.02374  | -553.02327 | -25.5 | 74.4  |
| <sup>6</sup> [Ru(H <sub>2</sub> O) <sub>4</sub> ] <sup>3+</sup>                      | 0.10062 | -400.09272 | 0.04691  | -400.14643 |       |       |
| <sup>6</sup> [Ru(H <sub>2</sub> O) <sub>4</sub> ] <sup>3+</sup> + 2*H <sub>2</sub> O | 0.14318 | -552.91419 | 0.04552  | -553.01184 | -41.0 | 104.4 |
| <sup>6</sup> [Ru(H <sub>2</sub> O) <sub>5</sub> ] <sup>3+</sup>                      | 0.12691 | -476.50939 | 0.06863  | -476.56767 |       |       |
| <sup>6</sup> [Ru(H <sub>2</sub> O) <sub>5</sub> ] <sup>3+</sup> + H <sub>2</sub> O   | 0.14819 | -552.92012 | 0.06794  | -553.00038 | -56.6 | 134.5 |
| <sup>6</sup> [Ru(H <sub>2</sub> O) <sub>6</sub> ] <sup>3+</sup>                      | 0.15012 | -552.93090 | 0.08537  | -552.99564 | -84.9 | 146.9 |
| <sup>4</sup> Ru <sup>3+</sup>                                                        | 0.00000 | -94.35303  | -0.02062 | -94.37365  |       |       |
| <sup>4</sup> Ru <sup>3+</sup> + 6*H <sub>2</sub> O                                   | 0.12767 | -552.81743 | -0.02480 | -552.96991 | 213.1 | 214.5 |
| <sup>4</sup> [Ru(H <sub>2</sub> O)] <sup>3+</sup>                                    | 0.02480 | -170.79132 | -0.00911 | -170.82523 |       |       |
| <sup>4</sup> [Ru(H <sub>2</sub> O)] <sup>3+</sup> + 5*H <sub>2</sub> O               | 0.13120 | -552.84498 | -0.01260 | -552.98878 | 140.7 | 165.0 |
| <sup>4</sup> [Ru(H <sub>2</sub> O) <sub>2</sub> ] <sup>3+</sup>                      | 0.05089 | -247.22532 | 0.01143  | -247.26478 |       |       |
| <sup>4</sup> [Ru(H <sub>2</sub> O) <sub>2</sub> ] <sup>3+</sup> + 4*H <sub>2</sub> O | 0.13600 | -552.86825 | 0.00864  | -552.99561 | 79.6  | 147.0 |
| <sup>4</sup> [Ru(H <sub>2</sub> O) <sub>3</sub> ] <sup>3+</sup>                      | 0.07697 | -323.65876 | 0.03039  | -323.70534 |       |       |
| <sup>4</sup> [Ru(H <sub>2</sub> O) <sub>3</sub> ] <sup>3+</sup> + 3*H <sub>2</sub> O | 0.14081 | -552.89096 | 0.02830  | -553.00347 | 20.0  | 126.4 |
| <sup>4</sup> [Ru(H <sub>2</sub> O) <sub>4</sub> ] <sup>3+</sup>                      | 0.10432 | -400.08881 | 0.05456  | -400.13857 |       |       |
| <sup>4</sup> [Ru(H <sub>2</sub> O) <sub>4</sub> ] <sup>3+</sup> + 2*H <sub>2</sub> O | 0.14688 | -552.91027 | 0.05317  | -553.00398 | -30.7 | 125.0 |
| <sup>4</sup> [Ru(H <sub>2</sub> O) <sub>5</sub> ] <sup>3+</sup>                      | 0.13031 | -476.50577 | 0.07513  | -476.56095 |       |       |
| <sup>4</sup> [Ru(H <sub>2</sub> O) <sub>5</sub> ] <sup>3+</sup> + H <sub>2</sub> O   | 0.15159 | -552.91650 | 0.07443  | -552.99366 | -47.0 | 152.2 |
| <sup>4</sup> [Ru(H <sub>2</sub> O) <sub>6</sub> ] <sup>3+</sup>                      | 0.15399 | -552.92391 | 0.09189  | -552.98601 | -66.5 | 172.2 |
| <sup>2</sup> Ru <sup>3+</sup>                                                        | 0.00000 | -94.27499  | -0.01969 | -94.29468  |       |       |
| <sup>2</sup> Ru <sup>3+</sup> + 6*H <sub>2</sub> O                                   | 0.12767 | -552.73939 | -0.02388 | -552.89094 | 418.0 | 421.8 |
| <sup>2</sup> [Ru(H <sub>2</sub> O)] <sup>3+</sup>                                    | 0.02461 | -170.75134 | -0.00846 | -170.78441 |       |       |
| <sup>2</sup> [Ru(H <sub>2</sub> O)] <sup>3+</sup> + 5*H <sub>2</sub> O               | 0.13100 | -552.80501 | -0.01194 | -552.94795 | 245.7 | 272.1 |
| <sup>2</sup> [Ru(H <sub>2</sub> O) <sub>2</sub> ] <sup>3+</sup>                      | 0.05166 | -247.18733 | 0.01246  | -247.22653 |       |       |
| <sup>2</sup> [Ru(H <sub>2</sub> O) <sub>2</sub> ] <sup>3+</sup> + 4*H <sub>2</sub> O | 0.13677 | -552.83026 | 0.00967  | -552.95736 | 179.4 | 247.5 |
| <sup>2</sup> [Ru(H <sub>2</sub> O) <sub>3</sub> ] <sup>3+</sup>                      | 0.07882 | -323.61706 | 0.03477  | -323.66111 |       |       |
| <sup>2</sup> [Ru(H <sub>2</sub> O) <sub>3</sub> ] <sup>3+</sup> + 3*H <sub>2</sub> O | 0.14266 | -552.84926 | 0.03268  | -552.95924 | 129.5 | 242.5 |
| <sup>2</sup> [Ru(H <sub>2</sub> O) <sub>4</sub> ] <sup>3+</sup>                      | 0.10642 | -400.05557 | 0.05864  | -400.10335 |       |       |
| <sup>2</sup> [Ru(H <sub>2</sub> O) <sub>4</sub> ] <sup>3+</sup> + 2*H <sub>2</sub> O | 0.14898 | -552.87704 | 0.05725  | -552.96877 | 56.6  | 217.5 |
| <sup>2</sup> [Ru(H <sub>2</sub> O) <sub>5</sub> ] <sup>3+</sup>                      | 0.13203 | -476.48854 | 0.07921  | -476.54136 |       |       |
| <sup>2</sup> [Ru(H <sub>2</sub> O) <sub>5</sub> ] <sup>3+</sup> + H <sub>2</sub> O   | 0.15331 | -552.89927 | 0.07851  | -552.97407 | -1.8  | 203.6 |
| <sup>2</sup> [Ru(H <sub>2</sub> O) <sub>6</sub> ] <sup>3+</sup>                      | 0.15826 | -552.92269 | 0.09993  | -552.98102 | -63.3 | 185.3 |

**Table S5.** Zero-point energies (*ZPE*, hartree), thermal correction to Gibbs free energy ( $G_0$ , hartree), total energies ( $E_c$ , hartree) corrected by *ZPE*, sum of electronic and thermal free energies ( $G_c$ , hartree) with *ZPE* and thermal corrections, and relative energies ( $E_r$ , kJ mol<sup>-1</sup>) and relative Gibbs free energies ( $G_r$ , kJ mol<sup>-1</sup>) relative to <sup>6</sup>Ru<sup>3+</sup>, PPh<sub>3</sub>, NEt<sub>3</sub> and PY for <sup>6</sup>[Ru(H<sub>2</sub>O)]<sup>3+</sup>, <sup>6</sup>[Ru(PPh<sub>3</sub>)]<sup>3+</sup>, <sup>6</sup>[Ru(NEt<sub>3</sub>)]<sup>3+</sup> and <sup>6</sup>[Ru(PY)]<sup>3+</sup> complexes at M06/def2TZVP, 6-311++G(d,p) level in aqueous solution.

| Species                                                                                       | <i>ZPE</i> | $E_c$       | $G_0$    | $G_c$       | $E_r$ | $G_r$ |
|-----------------------------------------------------------------------------------------------|------------|-------------|----------|-------------|-------|-------|
| <sup>6</sup> Ru <sup>3+</sup>                                                                 | 0.00000    | -94.43419   | -0.02116 | -94.45535   |       |       |
| H <sub>2</sub> O                                                                              | 0.02128    | -76.41073   | -0.00070 | -76.43271   |       |       |
| PPh <sub>3</sub>                                                                              | 0.27244    | -1035.47240 | 0.20382  | -1035.54102 |       |       |
| NEt <sub>3</sub>                                                                              | 0.20387    | -292.05597  | 0.15681  | -292.10303  |       |       |
| PY                                                                                            | 0.08809    | -248.07271  | 0.05210  | -248.10871  |       |       |
| <sup>6</sup> Ru <sup>3+</sup> + H <sub>2</sub> O + PPh <sub>3</sub> + NEt <sub>3</sub> + PY   | 0.58568    | -1746.44599 | 0.39087  | -1746.64081 | 0.0   | 0.0   |
| <sup>6</sup> [Ru(H <sub>2</sub> O)] <sup>3+</sup>                                             | 0.02440    | -170.84837  | -0.01069 | -170.88345  |       |       |
| <sup>6</sup> [Ru(H <sub>2</sub> O)] <sup>3+</sup> + PPh <sub>3</sub> + NEt <sub>3</sub> + PY  | 0.58880    | -1746.44944 | 0.40203  | -1746.63620 | -9.1  | 12.1  |
| <sup>6</sup> [Ru(PPh <sub>3</sub> )] <sup>3+</sup>                                            | 0.27415    | -1129.92479 | 0.19644  | -1130.00251 |       |       |
| <sup>6</sup> [Ru(PPh <sub>3</sub> )] <sup>3+</sup> + NEt <sub>3</sub> + PY + H <sub>2</sub> O | 0.58740    | -1746.46420 | 0.40465  | -1746.64695 | -47.8 | -16.1 |
| <sup>6</sup> [Ru(NEt <sub>3</sub> )] <sup>3+</sup>                                            | 0.20889    | -386.50218  | 0.15581  | -386.55526  |       |       |
| <sup>6</sup> [Ru(NEt <sub>3</sub> )] <sup>3+</sup> + PY + H <sub>2</sub> O + PPh <sub>3</sub> | 0.59070    | -1746.45802 | 0.41103  | -1746.63769 | -31.6 | 8.2   |
| <sup>6</sup> [Ru(PY)] <sup>3+</sup>                                                           | 0.09029    | -342.51063  | 0.04525  | -342.55568  |       |       |
| <sup>6</sup> [Ru(PY)] <sup>3+</sup> + H <sub>2</sub> O + PPh <sub>3</sub> + NEt <sub>3</sub>  | 0.58788    | -1746.44973 | 0.40518  | -1746.63243 | -9.8  | 22.0  |

**Table S6.** Zero-point energies ( $ZPE$ , hartree), thermal correction to Gibbs free energy ( $G_0$ , hartree), total energies ( $E_c$ , hartree) corrected by  $ZPE$ , sum of electronic and thermal free energies ( $G_c$ , hartree) with  $ZPE$  and thermal corrections, and relative energies ( $E_r$ ,  $\text{kJ mol}^{-1}$ ) and relative Gibbs free energies ( $G_r$ ,  $\text{kJ mol}^{-1}$ ) relative to the reactants for hydrogenation of LA to GVL, OT and MFD with  $\text{H}_2$  as H-source at M06/def2TZVP, 6-311++G(d,p) level in aqueous solution.

| Species                                             | $ZPE$   | $E_c$      | $G_0$    | $G_c$      | $E_r$ | $G_r$ |
|-----------------------------------------------------|---------|------------|----------|------------|-------|-------|
| LA                                                  | 0.12706 | -420.80704 | 0.07904  | -420.85507 |       |       |
| $\text{H}_2$                                        | 0.00981 | -1.15796   | -0.00228 | -1.17005   |       |       |
| HCOOH                                               | 0.03342 | -189.70312 | 0.00298  | -189.73356 |       |       |
| $\text{NEt}_3$                                      | 0.20387 | -292.05597 | 0.15681  | -292.10303 |       |       |
| $\text{H}_2\text{O}$                                | 0.02128 | -76.41073  | -0.00070 | -76.43271  |       |       |
| GVL                                                 | 0.12519 | -345.57698 | 0.08391  | -345.61826 |       |       |
| OT                                                  | 0.12081 | -345.55701 | 0.07452  | -345.60330 |       |       |
| MFD                                                 | 0.15403 | -421.96688 | 0.10976  | -422.01115 |       |       |
| LA + HCOOH + $\text{H}_2$ + $\text{NEt}_3$          | 0.37416 | -903.72409 | 0.23655  | -903.86170 | 0.0   | 0.0   |
| $\text{H}_2$                                        | 0.00981 | -1.15796   | -0.00228 | -1.17005   |       |       |
| $\text{H}_2$ + LA + HCOOH + $\text{NEt}_3$          | 0.37416 | -903.72409 | 0.23655  | -903.86170 | 0.0   | 0.0   |
| U-H-G-IM1                                           | 0.14178 | -421.96102 | 0.08835  | -422.01445 |       |       |
| U-H-G-IM1 + HCOOH + $\text{NEt}_3$                  | 0.37907 | -903.72011 | 0.24815  | -903.85103 | 10.5  | 28.0  |
| U-H-G-TS1                                           | 0.14368 | -421.87004 | 0.09560  | -421.91812 |       |       |
| U-H-G-TS1 + HCOOH + $\text{NEt}_3$                  | 0.38097 | -903.62912 | 0.25539  | -903.75470 | 249.3 | 280.9 |
| U-H-G-IM2                                           | 0.15125 | -421.98331 | 0.10259  | -422.03196 |       |       |
| U-H-G-IM2 + HCOOH + $\text{NEt}_3$                  | 0.38854 | -903.74239 | 0.26239  | -903.86854 | -48.0 | -18.0 |
| U-H-G-IM3                                           | 0.15203 | -421.98579 | 0.10522  | -422.03259 |       |       |
| U-H-G-IM3 + HCOOH + $\text{NEt}_3$                  | 0.38932 | -903.74487 | 0.26502  | -903.86917 | -54.6 | -19.6 |
| U-H-G-TS2                                           | 0.14649 | -421.91313 | 0.10229  | -421.95734 |       |       |
| U-H-G-TS2 + HCOOH + $\text{NEt}_3$                  | 0.38379 | -903.67221 | 0.26208  | -903.79392 | 136.2 | 178.0 |
| U-H-G-IM4                                           | 0.14989 | -421.98840 | 0.09838  | -422.03991 |       |       |
| U-H-G-IM4 + HCOOH + $\text{NEt}_3$                  | 0.38718 | -903.74748 | 0.25817  | -903.87649 | -61.4 | -38.8 |
| GVL                                                 | 0.12519 | -345.57698 | 0.08391  | -345.61826 |       |       |
| GVL + HCOOH + $\text{NEt}_3$ + $\text{H}_2\text{O}$ | 0.38376 | -903.74680 | 0.24300  | -903.88755 | -59.6 | -67.9 |
| U-H-M-IM1                                           | 0.14173 | -421.96106 | 0.08761  | -422.01518 |       |       |
| U-H-M-IM1 + HCOOH + $\text{NEt}_3$                  | 0.37902 | -903.72014 | 0.24740  | -903.85176 | 10.4  | 26.1  |
| U-H-M-TS1                                           | 0.14101 | -421.86143 | 0.09041  | -421.91203 |       |       |
| U-H-M-TS1 + HCOOH + $\text{NEt}_3$                  | 0.37830 | -903.62051 | 0.25020  | -903.74861 | 271.9 | 296.9 |
| U-H-M-IM2                                           | 0.15071 | -421.96828 | 0.10022  | -422.01878 |       |       |
| U-H-M-IM2 + HCOOH + $\text{NEt}_3$                  | 0.38800 | -903.72737 | 0.26001  | -903.85536 | -8.6  | 16.6  |
| U-H-M-IM3                                           | 0.15132 | -421.96761 | 0.10299  | -422.01594 |       |       |
| U-H-M-IM3 + HCOOH + $\text{NEt}_3$                  | 0.38861 | -903.72669 | 0.26278  | -903.85252 | -6.8  | 24.1  |
| U-H-M-TS2                                           | 0.14708 | -421.90574 | 0.10326  | -421.94956 |       |       |
| U-H-M-TS2 + HCOOH + $\text{NEt}_3$                  | 0.38437 | -903.66482 | 0.26306  | -903.78614 | 155.6 | 198.4 |
| MFD                                                 | 0.15403 | -421.96688 | 0.10976  | -422.01115 |       |       |
| MFD + HCOOH + $\text{NEt}_3$                        | 0.39132 | -903.72596 | 0.26955  | -903.84773 | -4.9  | 36.7  |
| U-H-O-TS2                                           | 0.14479 | -421.90582 | 0.09560  | -421.95502 |       |       |
| U-H-O-TS2 + HCOOH + $\text{NEt}_3$                  | 0.38208 | -903.66491 | 0.25539  | -903.79160 | 155.4 | 184.1 |
| U-H-O-IM3                                           | 0.14516 | -421.96767 | 0.08844  | -422.02439 |       |       |
| U-H-O-IM3 + HCOOH + $\text{NEt}_3$                  | 0.38245 | -903.72675 | 0.24823  | -903.86097 | -7.0  | 1.9   |
| OT                                                  | 0.12081 | -345.55701 | 0.07452  | -345.60330 |       |       |
| OT + HCOOH + $\text{NEt}_3$ + $\text{H}_2\text{O}$  | 0.37938 | -903.72683 | 0.23361  | -903.87259 | -7.2  | -28.6 |

**Table S7.** Zero-point energies ( $ZPE$ , hartree), thermal correction to Gibbs free energy ( $G_0$ , hartree), total energies ( $E_c$ , hartree) corrected by  $ZPE$ , sum of electronic and thermal free energies ( $G_c$ , hartree) with  $ZPE$  and thermal corrections, and relative energies ( $E_r$ ,  $\text{kJ mol}^{-1}$ ) and relative Gibbs free energies ( $G_r$ ,  $\text{kJ mol}^{-1}$ ) relative to the reactants for hydrogenation of LA to GVL, OT and MFD with HCOOH as H-source at M06/def2TZVP, 6-311++G(d,p) level in aqueous solution.

| Species                                        | $ZPE$    | $E_c$       | $G_0$    | $G_c$      | $E_r$ | $G_r$ |
|------------------------------------------------|----------|-------------|----------|------------|-------|-------|
| LA                                             | 0.12706  | -420.80704  | 0.07904  | -420.85507 |       |       |
| H <sub>2</sub>                                 | 0.00981  | -1.15796    | -0.00228 | -1.17005   |       |       |
| HCOOH                                          | 0.03342  | -189.70312  | 0.00298  | -189.73356 |       |       |
| NEt <sub>3</sub>                               | 0.20387  | -292.05597  | 0.15681  | -292.10303 |       |       |
| H <sub>2</sub> O                               | 0.02128  | -76.41073   | -0.00070 | -76.43271  |       |       |
| GVL                                            | 0.12519  | -345.57698  | 0.08391  | -345.61826 |       |       |
| OT                                             | 0.12081  | -345.55701  | 0.07452  | -345.60330 |       |       |
| MFD                                            | 0.15403  | -421.96688  | 0.10976  | -422.01115 |       |       |
| LA + HCOOH + H <sub>2</sub> + NEt <sub>3</sub> | 0.37416  | -903.72409  | 0.23655  | -903.86170 | 0.0   | 0.0   |
| HCOOH                                          | 0.03342  | -189.70312  | 0.00298  | -189.73356 |       |       |
| HCOOH + LA + H <sub>2</sub> + NEt <sub>3</sub> | 0.37416  | -903.72409  | 0.23655  | -903.86170 | 0.0   | 0.0   |
| U-F-G-IM1                                      | 0.16220  | -610.51861  | 0.09897  | -610.58183 |       |       |
| U-F-G-IM1 + H <sub>2</sub> + NEt <sub>3</sub>  | 0.37587  | -903.73253  | 0.25351  | -903.85490 | -22.2 | 17.8  |
| U-F-G-TS1                                      | 0.15552  | -610.39456  | 0.09888  | -610.45120 |       |       |
| U-F-G-TS1 + H <sub>2</sub> + NEt <sub>3</sub>  | 0.36920  | -903.60849  | 0.25341  | -903.72427 | 303.5 | 360.8 |
| U-F-G-IM2                                      | 0.16509  | -610.53180  | 0.10518  | -610.59171 |       |       |
| U-F-G-IM2 + H <sub>2</sub> + NEt <sub>3</sub>  | 0.37877  | -903.74572  | 0.25971  | -903.86478 | -56.8 | -8.1  |
| U-F-M-IM1                                      | 0.162556 | -610.519321 | 0.10048  | -610.58139 |       |       |
| U-F-M-IM1 + H <sub>2</sub> + NEt <sub>3</sub>  | 0.37624  | -903.73325  | 0.25502  | -903.85447 | -24.0 | 19.0  |
| U-F-M-TS1                                      | 0.15473  | -610.37850  | 0.09746  | -610.43578 |       |       |
| U-F-M-TS1 + H <sub>2</sub> + NEt <sub>3</sub>  | 0.36841  | -903.59243  | 0.25199  | -903.70885 | 345.7 | 401.3 |
| U-F-M-IM2                                      | 0.164444 | -610.51666  | 0.10304  | -610.57807 |       |       |
| U-F-M-IM2 + H <sub>2</sub> + NEt <sub>3</sub>  | 0.37812  | -903.73059  | 0.25757  | -903.85114 | -17.1 | 27.7  |

**Table S8.** Zero-point energies ( $ZPE$ , hartree), thermal correction to Gibbs free energy ( $G_0$ , hartree), total energies ( $E_c$ , hartree) corrected by  $ZPE$ , sum of electronic and thermal free energies ( $G_c$ , hartree) with  $ZPE$  and thermal corrections, and relative energies ( $E_r$ ,  $\text{kJ mol}^{-1}$ ) and relative Gibbs free energies ( $G_r$ ,  $\text{kJ mol}^{-1}$ ) relative to the reactants for the reaction of  $\text{LA} + \text{HCOOH} \rightarrow \text{GVL} + \text{H}_2\text{O} + \text{CO}_2$  through hydrogenation of ketone carbonyl in the presence of  $\text{NEt}_3$  ligand at M06/def2TZVP, 6-311++G(d,p) level in aqueous solution.

| Species                                                                                         | $ZPE$    | $E_c$       | $G_0$     | $G_c$       | $E_r$ | $G_r$ |
|-------------------------------------------------------------------------------------------------|----------|-------------|-----------|-------------|-------|-------|
| LA                                                                                              | 0.12706  | -420.80704  | 0.07904   | -420.85507  |       |       |
| H <sub>2</sub>                                                                                  | 0.00981  | -1.15796    | -0.00228  | -1.17005    |       |       |
| HCOOH                                                                                           | 0.03342  | -189.70312  | 0.00298   | -189.73356  |       |       |
| NEt <sub>3</sub>                                                                                | 0.20387  | -292.05597  | 0.15681   | -292.10303  |       |       |
| H <sub>2</sub> O                                                                                | 0.02128  | -76.41073   | -0.00070  | -76.43271   |       |       |
| GVL                                                                                             | 0.12519  | -345.57698  | 0.08391   | -345.61826  |       |       |
| OT                                                                                              | 0.12081  | -345.55701  | 0.07452   | -345.60330  |       |       |
| MFD                                                                                             | 0.15403  | -421.96688  | 0.10976   | -422.01115  |       |       |
| [HNEt <sub>3</sub> ] <sup>+</sup>                                                               | 0.21950  | -292.50499  | 0.17264   | -292.55185  |       |       |
| CO <sub>2</sub>                                                                                 | 0.01180  | -188.54399  | -0.01351  | -188.56930  |       |       |
| LA + HCOOH + H <sub>2</sub> + NEt <sub>3</sub>                                                  | 0.37416  | -903.72409  | 0.23655   | -903.86170  | 0.0   | 0.0   |
| HCOOH                                                                                           | 0.033418 | -189.703116 | 0.002979  | -189.733555 |       |       |
| HCOOH + LA + H <sub>2</sub> + NEt <sub>3</sub>                                                  | 0.374161 | -903.724086 | 0.236551  | -903.861696 | 0.0   | 0.0   |
| 1-F-N-IM1                                                                                       | 0.24078  | -481.76171  | 0.18177   | -481.82072  |       |       |
| 1-F-N-IM1 + LA + H <sub>2</sub>                                                                 | 0.37765  | -903.72671  | 0.25853   | -903.84583  | -6.9  | 41.7  |
| 1-F-N-TS1                                                                                       | 0.23486  | -481.76264  | 0.17707   | -481.82043  |       |       |
| 1-F-N-TS1 + LA + H <sub>2</sub>                                                                 | 0.37173  | -903.72764  | 0.25383   | -903.84554  | -9.3  | 42.4  |
| 1-F-N-IM2                                                                                       | 0.24136  | -481.78477  | 0.18288   | -481.84325  |       |       |
| N-F-G-IM2 + LA + H <sub>2</sub>                                                                 | 0.378231 | -903.749777 | 0.259639  | -903.868369 | -67.4 | -17.5 |
| [N-F-G-IM3] <sup>-</sup>                                                                        | 0.149705 | -610.075691 | 0.088829  | -610.136568 |       |       |
| [N-F-G-IM3] <sup>-</sup> + H <sub>2</sub> + [HNEt <sub>3</sub> ] <sup>+</sup>                   | 0.379014 | -903.738641 | 0.259188  | -903.858468 | -38.2 | 8.5   |
| [N-F-G-TS2] <sup>-</sup>                                                                        | 0.146803 | -610.031776 | 0.0888081 | -610.090499 |       |       |
| [N-F-G-TS2] <sup>-</sup> + H <sub>2</sub> + [HNEt <sub>3</sub> ] <sup>+</sup>                   | 0.376112 | -903.694726 | 0.25844   | -903.812399 | 77.1  | 129.4 |
| [N-F-G-IM4] <sup>-</sup>                                                                        | 0.150561 | -610.050162 | 0.090403  | -610.110321 |       |       |
| [N-F-G-IM4] <sup>-</sup> + H <sub>2</sub> + [HNEt <sub>3</sub> ] <sup>+</sup>                   | 0.37987  | -903.713112 | 0.260762  | -903.832221 | 28.8  | 77.4  |
| [N-F-G-IM5] <sup>-</sup>                                                                        | 0.13729  | -421.50307  | 0.08926   | -421.55109  |       |       |
| [N-F-G-IM4] <sup>-</sup> + H <sub>2</sub> + [HNEt <sub>3</sub> ] <sup>+</sup> + CO <sub>2</sub> | 0.37840  | -903.71001  | 0.24611   | -903.84229  | 37.0  | 51.0  |
| N-F-G-IM6                                                                                       | 0.35631  | -714.03415  | 0.28434   | -714.10612  |       |       |
| N-F-G-IM6 + H <sub>2</sub> + CO <sub>2</sub>                                                    | 0.37791  | -903.73611  | 0.26856   | -903.84546  | -31.6 | 42.6  |
| N-F-G-TS3                                                                                       | 0.35931  | -714.02496  | 0.29230   | -714.09197  |       |       |
| N-F-G-TS3 + H <sub>2</sub> + CO <sub>2</sub>                                                    | 0.38092  | -903.72691  | 0.27652   | -903.83131  | -7.4  | 79.8  |
| N-F-G-IM7                                                                                       | 0.36020  | -714.02917  | 0.29175   | -714.09762  |       |       |
| N-F-G-IM7 + H <sub>2</sub> + CO <sub>2</sub>                                                    | 0.38180  | -903.73113  | 0.27596   | -903.83696  | -18.5 | 64.9  |
| N-F-G-TS4                                                                                       | 0.35742  | -714.01997  | 0.28683   | -714.09056  |       |       |
| N-F-G-TS4 + H <sub>2</sub> + CO <sub>2</sub>                                                    | 0.37902  | -903.72193  | 0.27104   | -903.82991  | 5.7   | 83.5  |
| N-F-G-IM8                                                                                       | 0.35766  | -714.04773  | 0.28477   | -714.12062  |       |       |
| N-F-G-IM8 + H <sub>2</sub> + CO <sub>2</sub>                                                    | 0.37926  | -903.74968  | 0.26898   | -903.85996  | -67.2 | 4.6   |
| GVL                                                                                             | 0.12519  | -345.57698  | 0.08391   | -345.61826  |       |       |
| GVL + H <sub>2</sub> + CO <sub>2</sub> + H <sub>2</sub> O + NEt <sub>3</sub>                    | 0.37194  | -903.74564  | 0.22424   | -903.89334  | -56.6 | -83.1 |

**Table S9.** Zero-point energies ( $ZPE$ , hartree), thermal correction to Gibbs free energy ( $G_0$ , hartree), total energies ( $E_c$ , hartree) corrected by  $ZPE$ , sum of electronic and thermal free energies ( $G_c$ , hartree) with  $ZPE$  and thermal corrections, and relative energies ( $E_r$ ,  $\text{kJ mol}^{-1}$ ) and relative Gibbs free energies ( $G_r$ ,  $\text{kJ mol}^{-1}$ ) relative to the reactants for the reactions of  $\text{LA} + \text{HCOOH} \rightarrow \text{MFD} + \text{H}_2\text{O} + \text{CO}_2$  and  $\text{LA} + \text{HCOOH} \rightarrow \text{OT} + \text{CO}_2$  through carboxyl carbonyl hydrogenation in the presence of  $\text{NEt}_3$  ligand at M06/def2TZVP, 6-311++G(d,p) level in aqueous solution.

| Species                                                                                         | $ZPE$    | $E_c$       | $G_0$    | $G_c$       | $E_r$ | $G_r$ |
|-------------------------------------------------------------------------------------------------|----------|-------------|----------|-------------|-------|-------|
| LA                                                                                              | 0.12706  | -420.80704  | 0.07904  | -420.85507  |       |       |
| H <sub>2</sub>                                                                                  | 0.00981  | -1.15796    | -0.00228 | -1.17005    |       |       |
| HCOOH                                                                                           | 0.03342  | -189.70312  | 0.00298  | -189.73356  |       |       |
| NEt <sub>3</sub>                                                                                | 0.20387  | -292.05597  | 0.15681  | -292.10303  |       |       |
| H <sub>2</sub> O                                                                                | 0.02128  | -76.41073   | -0.00070 | -76.43271   |       |       |
| GVL                                                                                             | 0.12519  | -345.57698  | 0.08391  | -345.61826  |       |       |
| OT                                                                                              | 0.12081  | -345.55701  | 0.07452  | -345.60330  |       |       |
| MFD                                                                                             | 0.15403  | -421.96688  | 0.10976  | -422.01115  |       |       |
| [HNEt <sub>3</sub> ] <sup>+</sup>                                                               | 0.21950  | -292.50499  | 0.17264  | -292.55185  |       |       |
| CO <sub>2</sub>                                                                                 | 0.01180  | -188.54399  | -0.01351 | -188.56930  |       |       |
| LA + HCOOH + H <sub>2</sub> + NEt <sub>3</sub>                                                  | 0.37416  | -903.72409  | 0.23655  | -903.86170  | 0.0   | 0.0   |
| HCOOH                                                                                           | 0.03342  | -189.70312  | 0.00298  | -189.73356  |       |       |
| HCOOH + LA + H <sub>2</sub> + NEt <sub>3</sub>                                                  | 0.37416  | -903.72409  | 0.23655  | -903.86170  | 0.0   | 0.0   |
| 1-F-N-IM1                                                                                       | 0.24078  | -481.76171  | 0.18177  | -481.82072  |       |       |
| 1-F-N-IM1 + LA + H <sub>2</sub>                                                                 | 0.37765  | -903.72671  | 0.25853  | -903.84583  | -6.9  | 41.7  |
| 1-F-N-TS1                                                                                       | 0.23486  | -481.76264  | 0.17707  | -481.82043  |       |       |
| 1-F-N-TS1 + LA + H <sub>2</sub>                                                                 | 0.37173  | -903.72764  | 0.25383  | -903.84554  | -9.3  | 42.4  |
| 1-F-N-IM2                                                                                       | 0.24136  | -481.78477  | 0.18288  | -481.84325  |       |       |
| N-F-G-IM2 + LA + H <sub>2</sub>                                                                 | 0.378231 | -903.749777 | 0.259639 | -903.868369 | -67.4 | -17.5 |
| [N-F-M-TS2] <sup>-</sup>                                                                        | 0.14559  | -610.02588  | 0.08504  | -610.08643  |       |       |
| [N-F-M-TS2] <sup>-</sup> + H <sub>2</sub> + [HNEt <sub>3</sub> ] <sup>+</sup>                   | 0.37489  | -903.68883  | 0.25540  | -903.80833  | 92.6  | 140.1 |
| [N-F-M-IM4] <sup>-</sup>                                                                        | 0.14896  | -610.04621  | 0.08729  | -610.10789  |       |       |
| [N-F-M-IM4] <sup>-</sup> + H <sub>2</sub> + [HNEt <sub>3</sub> ] <sup>+</sup>                   | 0.37827  | -903.70916  | 0.25765  | -903.82979  | 39.2  | 83.8  |
| [N-F-M-IM5] <sup>-</sup>                                                                        | 0.13611  | -421.49887  | 0.08670  | -421.54828  |       |       |
| [N-F-M-IM5] <sup>-</sup> + H <sub>2</sub> + [HNEt <sub>3</sub> ] <sup>+</sup> + CO <sub>2</sub> | 0.37722  | -903.70581  | 0.24355  | -903.83948  | 48.0  | 58.3  |
| N-F-M-IM6                                                                                       | 0.35679  | -714.02646  | 0.28447  | -714.09878  |       |       |
| N-F-M-IM6 + H <sub>2</sub> + CO <sub>2</sub>                                                    | 0.37840  | -903.72841  | 0.26869  | -903.83812  | -11.4 | 61.9  |
| N-F-M-TS3                                                                                       | 0.35883  | -714.01769  | 0.29177  | -714.08475  |       |       |
| N-F-M-TS3 + H <sub>2</sub> + CO <sub>2</sub>                                                    | 0.38043  | -903.71964  | 0.27599  | -903.82409  | 11.7  | 98.7  |
| 7-F-M-IM9                                                                                       | 0.35886  | -714.02138  | 0.28842  | -714.09181  |       |       |
| 7-F-M-IM9 + H <sub>2</sub> + CO <sub>2</sub>                                                    | 0.38046  | -903.72333  | 0.27264  | -903.83116  | 2.0   | 80.2  |
| 7-F-M-TS4                                                                                       | 0.35578  | -714.02324  | 0.28912  | -714.08991  |       |       |
| 7-F-M-TS4 + H <sub>2</sub> + CO <sub>2</sub>                                                    | 0.37739  | -903.72520  | 0.27333  | -903.82925  | -2.9  | 85.2  |
| 7-F-M-IM10                                                                                      | 0.36016  | -714.03203  | 0.29067  | -714.10152  |       |       |
| 7-F-M-IM10 + H <sub>2</sub> + CO <sub>2</sub>                                                   | 0.38177  | -903.73399  | 0.27489  | -903.84087  | -26.0 | 54.7  |
| MFD                                                                                             | 0.15403  | -421.96688  | 0.10976  | -422.01115  |       |       |
| MFD + H <sub>2</sub> + CO <sub>2</sub> + NEt <sub>3</sub>                                       | 0.37951  | -903.72480  | 0.25079  | -903.85352  | -1.9  | 21.5  |
| N-F-O-TS3                                                                                       | 0.35422  | -714.01086  | 0.28180  | -714.08328  |       |       |
| N-F-O-TS3 + H <sub>2</sub> + CO <sub>2</sub>                                                    | 0.37582  | -903.71282  | 0.26602  | -903.82262  | 29.6  | 102.6 |
| N-F-O-IM7                                                                                       | 0.35292  | -714.02726  | 0.27388  | -714.10630  |       |       |
| N-F-O-IM7 + H <sub>2</sub> + CO <sub>2</sub>                                                    | 0.37453  | -903.72922  | 0.25810  | -903.84564  | -13.5 | 42.2  |
| OT                                                                                              | 0.12081  | -345.55701  | 0.07452  | -345.60330  |       |       |
| OT + H <sub>2</sub> + CO <sub>2</sub> + H <sub>2</sub> O + NEt <sub>3</sub>                     | 0.36756  | -903.72567  | 0.21485  | -903.87838  | -4.1  | -43.8 |

**Table S10.** Zero-point energies (*ZPE*, hartree), thermal correction to Gibbs free energy ( $G_0$ , hartree), total energies ( $E_c$ , hartree) corrected by *ZPE*, sum of electronic and thermal free energies ( $G_c$ , hartree) with *ZPE* and thermal corrections, and relative energies ( $E_r$ ,  $\text{kJ mol}^{-1}$ ) and relative Gibbs free energies ( $G_r$ ,  $\text{kJ mol}^{-1}$ ) relative to the reactants for the reaction of  ${}^6[\text{Ru}(\text{PPh}_3)]^{3+} + \text{HCOO}^- + \text{LA} \rightarrow {}^6[3\text{-F-K-IM5}]^{2+} + \text{CO}_2 + \text{PPh}_3$  through hydrogenation of ketone carbonyl at M06/def2TZVP, 6-311++G(d,p) level in aqueous solution.

| Species                                                                                                                      | <i>ZPE</i> | $E_c$        | $G_0$     | $G_c$        | $E_r$ | $G_r$ |
|------------------------------------------------------------------------------------------------------------------------------|------------|--------------|-----------|--------------|-------|-------|
| ${}^6[\text{Ru}(\text{PPh}_3)]^{3+}$                                                                                         | 0.27415    | -1129.92479  | 0.19644   | -1130.00251  |       |       |
| PPh <sub>3</sub>                                                                                                             | 0.27244    | -1035.47240  | 0.20382   | -1035.54102  |       |       |
| NEt <sub>3</sub>                                                                                                             | 0.20387    | -292.05597   | 0.15681   | -292.10303   |       |       |
| [HNEt <sub>3</sub> ] <sup>+</sup>                                                                                            | 0.21950    | -292.50499   | 0.17264   | -292.55185   |       |       |
| PY                                                                                                                           | 0.08809    | -248.07271   | 0.05210   | -248.10871   |       |       |
| LA                                                                                                                           | 0.12706    | -420.80704   | 0.07904   | -420.85507   |       |       |
| HCOOH                                                                                                                        | 0.03342    | -189.70312   | 0.00298   | -189.73356   |       |       |
| H <sub>2</sub>                                                                                                               | 0.00981    | -1.15796     | -0.00228  | -1.17005     |       |       |
| CO <sub>2</sub>                                                                                                              | 0.011798   | -188.543994  | -0.013507 | -188.569298  |       |       |
| ${}^6[\text{Ru}(\text{PPh}_3)]^{3+} + \text{PPh}_3 + \text{NEt}_3 + \text{PY} + \text{LA} + \text{HCOOH} + \text{H}_2$       | 1.008843   | -3317.193988 | 0.688905  | -3317.513926 | 0.0   | 0.0   |
| HCOO <sup>-</sup>                                                                                                            | 0.020569   | -189.264961  | -0.009333 | -189.294864  |       |       |
| $\text{HCOO}^- + {}^6[\text{Ru}(\text{PPh}_3)]^{3+} + \text{PPh}_3 + \text{PY} + \text{LA} + \text{H}_2 + [\text{HNEt}_3]^+$ | 1.011624   | -3317.204854 | 0.692416  | -3317.524064 | -28.5 | -26.6 |
| ${}^6[\text{F-K-C-IM1}]^{2+}$                                                                                                | 0.022604   | -283.723514  | -0.017665 | -283.763782  |       |       |
| ${}^6[\text{F-K-C-IM1}]^{2+} + 2*\text{PPh}_3 + \text{PY} + \text{LA} + \text{H}_2 + [\text{HNEt}_3]^+$                      | 1.011941   | -3317.211013 | 0.691461  | -3317.531491 | -44.7 | -46.1 |
| ${}^6[\text{F-K-C-IM2}]^{2+}$                                                                                                | 0.152587   | -704.541107  | 0.085512  | -704.608182  |       |       |
| ${}^6[\text{F-K-C-IM2}]^{2+} + 2*\text{PPh}_3 + \text{PY} + \text{H}_2 + [\text{HNEt}_3]^+$                                  | 1.01486    | -3317.221565 | 0.715602  | -3317.520821 | -72.4 | -18.1 |
| ${}^6[\text{F-K-C-TS1}]^{2+}$                                                                                                | 0.148068   | -704.504859  | 0.083008  | -704.569918  |       |       |
| ${}^6[\text{F-K-C-TS1}]^{2+} + 2*\text{PPh}_3 + \text{PY} + \text{H}_2 + [\text{HNEt}_3]^+$                                  | 1.010341   | -3317.185317 | 0.713098  | -3317.482557 | 22.8  | 82.4  |
| ${}^6[\text{F-K-C-IM3}]^{2+}$                                                                                                | 0.153525   | -704.545771  | 0.086247  | -704.613049  |       |       |
| ${}^6[\text{F-K-C-IM3}]^{2+} + 2*\text{PPh}_3 + \text{PY} + \text{H}_2 + [\text{HNEt}_3]^+$                                  | 1.015798   | -3317.226229 | 0.716337  | -3317.525688 | -84.6 | -30.9 |
| ${}^6[3\text{-F-K-IM5}]^{2+}$                                                                                                | 0.14037    | -516.00242   | 0.08295   | -516.05984   |       |       |
| ${}^6[3\text{-F-K-IM5}]^{2+} + 2*\text{PPh}_3 + \text{PY} + \text{H}_2 + [\text{HNEt}_3]^+ + \text{CO}_2$                    | 1.01444    | -3317.22687  | 0.69953   | -3317.54178  | -86.3 | -73.1 |

**Table S11.** Zero-point energies (*ZPE*, hartree), thermal correction to Gibbs free energy ( $G_0$ , hartree), total energies ( $E_c$ , hartree) corrected by *ZPE*, sum of electronic and thermal free energies ( $G_c$ , hartree) with *ZPE* and thermal corrections, and relative energies ( $E_r$ ,  $\text{kJ mol}^{-1}$ ) and relative Gibbs free energies ( $G_r$ ,  $\text{kJ mol}^{-1}$ ) relative to the reactants for the reaction of  ${}^6[\text{Ru}(\text{PPh}_3)]^{3+} + \text{HCOO}^- + \text{LA} \rightarrow {}^6[\text{6-F-O-IM5}]^{2+} + \text{CO}_2 + \text{PPh}_3$  through hydrogenation of carboxyl carbonyl at M06/def2TZVP, 6-311++G(d,p) level in aqueous solution.

| Species                                                                                                                      | <i>ZPE</i> | $E_c$       | $G_0$    | $G_c$       | $E_r$ | $G_r$ |
|------------------------------------------------------------------------------------------------------------------------------|------------|-------------|----------|-------------|-------|-------|
| ${}^6[\text{Ru}(\text{PPh}_3)]^{3+}$                                                                                         | 0.27415    | -1129.92479 | 0.19644  | -1130.00251 |       |       |
| PPh <sub>3</sub>                                                                                                             | 0.27244    | -1035.47240 | 0.20382  | -1035.54102 |       |       |
| NEt <sub>3</sub>                                                                                                             | 0.20387    | -292.05597  | 0.15681  | -292.10303  |       |       |
| [HNEt <sub>3</sub> ] <sup>+</sup>                                                                                            | 0.21950    | -292.50499  | 0.17264  | -292.55185  |       |       |
| PY                                                                                                                           | 0.08809    | -248.07271  | 0.05210  | -248.10871  |       |       |
| LA                                                                                                                           | 0.12706    | -420.80704  | 0.07904  | -420.85507  |       |       |
| HCOOH                                                                                                                        | 0.03342    | -189.70312  | 0.00298  | -189.73356  |       |       |
| H <sub>2</sub>                                                                                                               | 0.00981    | -1.15796    | -0.00228 | -1.17005    |       |       |
| CO <sub>2</sub>                                                                                                              | 0.01180    | -188.54399  | -0.01351 | -188.56930  |       |       |
| ${}^6[\text{Ru}(\text{PPh}_3)]^{3+} + \text{PPh}_3 + \text{NEt}_3 + \text{PY} + \text{LA} + \text{HCOOH} + \text{H}_2$       | 1.00884    | -3317.19399 | 0.68891  | -3317.51393 | 0.0   | 0.0   |
| HCOO <sup>-</sup>                                                                                                            | 0.02057    | -189.26496  | -0.00933 | -189.29486  |       |       |
| $\text{HCOO}^- + {}^6[\text{Ru}(\text{PPh}_3)]^{3+} + \text{PPh}_3 + \text{PY} + \text{LA} + \text{H}_2 + [\text{HNEt}_3]^+$ | 1.01162    | -3317.20485 | 0.69242  | -3317.52406 | -28.5 | -26.6 |
| ${}^6[\text{F-K-C-IM1}]^{2+}$                                                                                                | 0.02260    | -283.72351  | -0.01767 | -283.76378  |       |       |
| ${}^6[\text{F-K-C-IM1}]^{2+} + 2*\text{PPh}_3 + \text{PY} + \text{LA} + \text{H}_2 + [\text{HNEt}_3]^+$                      | 1.01194    | -3317.21101 | 0.69146  | -3317.53149 | -44.7 | -46.1 |
| ${}^6[\text{F-C-C-IM2}]^{2+}$                                                                                                | 0.15287    | -704.54330  | 0.08816  | -704.60800  |       |       |
| ${}^6[\text{F-C-C-IM2}]^{2+} + 2*\text{PPh}_3 + \text{PY} + \text{H}_2 + [\text{HNEt}_3]^+$                                  | 1.01514    | -3317.22375 | 0.71825  | -3317.52064 | -78.1 | -17.6 |
| ${}^6[\text{F-C-C-TS1}]^{2+}$                                                                                                | 0.14712    | -704.49225  | 0.08052  | -704.55885  |       |       |
| ${}^6[\text{F-C-C-TS1}]^{2+} + 2*\text{PPh}_3 + \text{PY} + \text{H}_2 + [\text{HNEt}_3]^+$                                  | 1.00939    | -3317.17271 | 0.71061  | -3317.47149 | 55.9  | 111.4 |
| ${}^6[\text{F-C-C-IM3}]^{2+}$                                                                                                | 0.15167    | -704.53562  | 0.08359  | -704.60370  |       |       |
| ${}^6[\text{F-C-C-IM3}]^{2+} + 2*\text{PPh}_3 + \text{PY} + \text{H}_2 + [\text{HNEt}_3]^+$                                  | 1.01394    | -3317.21608 | 0.71368  | -3317.51634 | -58.0 | -6.3  |
| ${}^6[\text{6-F-O-IM5}]^{2+}$                                                                                                | 0.13940    | -515.98718  | 0.07994  | -516.04664  |       |       |
| ${}^6[\text{6-F-O-IM5}]^{2+} + 2*\text{PPh}_3 + \text{PY} + \text{H}_2 + [\text{HNEt}_3]^+ + \text{CO}_2$                    | 1.01347    | -3317.21163 | 0.69653  | -3317.52857 | -46.3 | -38.4 |



**Table S12.** Zero-point energies ( $ZPE$ , hartree), thermal correction to Gibbs free energy ( $G_0$ , hartree), total energies ( $E_c$ , hartree) corrected by  $ZPE$ , sum of electronic and thermal free energies ( $G_c$ , hartree) with  $ZPE$  and thermal corrections, and relative energies ( $E_r$ ,  $\text{kJ mol}^{-1}$ ) and relative Gibbs free energies ( $G_r$ ,  $\text{kJ mol}^{-1}$ ) relative to the reactants for the reaction stage (i) of  $\text{HCOOH} + \text{L} \rightarrow \text{HCOO}^- + [\text{HL}]^+$  ( $\text{L} = \text{PPh}_3, \text{NEt}_3, \text{and PY}$ ) at M06/def2TZVP, 6-311++G(d,p) level in aqueous solution.

| Species                                                                                                                      | $ZPE$   | $E_c$       | $G_0$    | $G_c$       | $E_r$ | $G_r$ |
|------------------------------------------------------------------------------------------------------------------------------|---------|-------------|----------|-------------|-------|-------|
| ${}^6[\text{Ru}(\text{PPh}_3)]^{3+}$                                                                                         | 0.27415 | -1129.92479 | 0.19644  | -1130.00251 |       |       |
| $\text{PPh}_3$                                                                                                               | 0.27244 | -1035.47240 | 0.20382  | -1035.54102 |       |       |
| $[\text{HPPH}_3]^+$                                                                                                          | 0.28366 | -1035.91017 | 0.21535  | -1035.97848 |       |       |
| $\text{NEt}_3$                                                                                                               | 0.20387 | -292.05597  | 0.15681  | -292.10303  |       |       |
| $[\text{HNEt}_3]^+$                                                                                                          | 0.21950 | -292.50499  | 0.17264  | -292.55185  |       |       |
| $\text{PY}$                                                                                                                  | 0.08809 | -248.07271  | 0.05210  | -248.10871  |       |       |
| $[\text{HPY}]^+$                                                                                                             | 0.10172 | -248.51019  | 0.06550  | -248.54641  |       |       |
| $\text{LA}$                                                                                                                  | 0.12706 | -420.80704  | 0.07904  | -420.85507  |       |       |
| $\text{HCOOH}$                                                                                                               | 0.03342 | -189.70312  | 0.00298  | -189.73356  |       |       |
| $\text{H}_2$                                                                                                                 | 0.00981 | -1.15796    | -0.00228 | -1.17005    |       |       |
| ${}^6[\text{Ru}(\text{PPh}_3)]^{3+} + \text{PPh}_3 + \text{NEt}_3 + \text{PY} + \text{LA} + \text{HCOOH} + \text{H}_2$       | 1.00884 | -3317.19399 | 0.68891  | -3317.51393 | 0.0   | 0.0   |
| $\text{HCOOH}$                                                                                                               | 0.03342 | -189.70312  | 0.00298  | -189.73356  |       |       |
| $\text{HCOOH} + {}^6[\text{Ru}(\text{PPh}_3)]^{3+} + \text{PPh}_3 + \text{NEt}_3 + \text{PY} + \text{LA} + \text{H}_2$       | 1.00884 | -3317.19399 | 0.68891  | -3317.51393 | 0.0   | 0.0   |
| $1\text{-F-P-IM1}$                                                                                                           | 0.30780 | -1225.18671 | 0.22956  | -1225.26496 |       |       |
| $1\text{-F-P-IM1} + {}^6[\text{Ru}(\text{PPh}_3)]^{3+} + \text{NEt}_3 + \text{PY} + \text{LA} + \text{H}_2$                  | 1.01079 | -3317.20519 | 0.71167  | -3317.50431 | -29.4 | 25.3  |
| $1\text{-F-P-TS1}$                                                                                                           | 0.30224 | -1225.17795 | 0.22356  | -1225.25662 |       |       |
| $1\text{-F-P-TS1} + {}^6[\text{Ru}(\text{PPh}_3)]^{3+} + \text{NEt}_3 + \text{PY} + \text{LA} + \text{H}_2$                  | 1.00523 | -3317.19642 | 0.70567  | -3317.49598 | -6.4  | 47.1  |
| $1\text{-F-P-IM2}$                                                                                                           | 0.30540 | -1225.18435 | 0.22305  | -1225.26670 |       |       |
| $1\text{-F-P-IM2} + {}^6[\text{Ru}(\text{PPh}_3)]^{3+} + \text{NEt}_3 + \text{PY} + \text{LA} + \text{H}_2$                  | 1.00839 | -3317.20283 | 0.70516  | -3317.50606 | -23.2 | 20.7  |
| $\text{HCOO}^-$                                                                                                              | 0.02057 | -189.26496  | -0.00933 | -189.29486  |       |       |
| $\text{HCOO}^- + {}^6[\text{Ru}(\text{PPh}_3)]^{3+} + \text{NEt}_3 + \text{PY} + \text{LA} + \text{H}_2 + [\text{HPPH}_3]^+$ | 1.00722 | -3317.19361 | 0.68813  | -3317.51270 | 1.0   | 3.2   |
| $1\text{-F-N-IM1}$                                                                                                           | 0.24078 | -481.76171  | 0.18177  | -481.82072  |       |       |
| $1\text{-F-N-IM1} + {}^6[\text{Ru}(\text{PPh}_3)]^{3+} + \text{PPh}_3 + \text{PY} + \text{LA} + \text{H}_2$                  | 1.01233 | -3317.19662 | 0.71088  | -3317.49806 | -6.9  | 41.7  |
| $1\text{-F-N-TS1}$                                                                                                           | 0.23486 | -481.76264  | 0.17707  | -481.82043  |       |       |
| $1\text{-F-N-TS1} + {}^6[\text{Ru}(\text{PPh}_3)]^{3+} + \text{PPh}_3 + \text{PY} + \text{LA} + \text{H}_2$                  | 1.00641 | -3317.19754 | 0.70618  | -3317.49777 | -9.3  | 42.4  |
| $1\text{-F-N-IM2}$                                                                                                           | 0.24136 | -481.78477  | 0.18288  | -481.84325  |       |       |
| $1\text{-F-N-IM2} + {}^6[\text{Ru}(\text{PPh}_3)]^{3+} + \text{PPh}_3 + \text{PY} + \text{LA} + \text{H}_2$                  | 1.01291 | -3317.21968 | 0.71199  | -3317.52060 | -67.4 | -17.5 |
| $\text{HCOO}^-$                                                                                                              | 0.02057 | -189.26496  | -0.00933 | -189.29486  |       |       |
| $\text{HCOO}^- + {}^6[\text{Ru}(\text{PPh}_3)]^{3+} + \text{PPh}_3 + \text{PY} + \text{LA} + \text{H}_2 + [\text{HNEt}_3]^+$ | 1.01162 | -3317.20485 | 0.69242  | -3317.52406 | -28.5 | -26.6 |
| $1\text{-F-Y-IM1}$                                                                                                           | 0.12248 | -437.78748  | 0.07183  | -437.83813  |       |       |
| $1\text{-F-Y-IM1} + {}^6[\text{Ru}(\text{PPh}_3)]^{3+} + \text{PPh}_3 + \text{NEt}_3 + \text{LA} + \text{H}_2$               | 1.00981 | -3317.20565 | 0.70566  | -3317.50979 | -30.6 | 10.9  |
| $1\text{-F-Y-TS1}$                                                                                                           | 0.11869 | -437.78861  | 0.07018  | -437.83712  |       |       |
| $1\text{-F-Y-TS1} + {}^6[\text{Ru}(\text{PPh}_3)]^{3+} + \text{PPh}_3 + \text{NEt}_3 + \text{LA} + \text{H}_2$               | 1.00602 | -3317.20677 | 0.70401  | -3317.50878 | -33.6 | 13.5  |
| $1\text{-F-Y-IM2}$                                                                                                           | 0.12282 | -437.78894  | 0.07153  | -437.84023  |       |       |
| $1\text{-F-Y-IM2} + {}^6[\text{Ru}(\text{PPh}_3)]^{3+} + \text{PPh}_3 + \text{NEt}_3 + \text{LA} + \text{H}_2$               | 1.01015 | -3317.20711 | 0.70536  | -3317.51190 | -34.4 | 5.3   |
| $\text{HCOO}^-$                                                                                                              | 0.02057 | -189.26496  | -0.00933 | -189.29486  |       |       |
| $\text{HCOO}^- + {}^6[\text{Ru}(\text{PPh}_3)]^{3+} + \text{PPh}_3 + \text{NEt}_3 + \text{LA} + \text{H}_2 + [\text{HPY}]^+$ | 1.00962 | -3317.19331 | 0.68999  | -3317.51294 | 1.8   | 2.6   |

**Table S13.** Zero-point energies (*ZPE*, hartree), thermal correction to Gibbs free energy ( $G_0$ , hartree), total energies ( $E_c$ , hartree) corrected by *ZPE*, Sum of electronic and thermal free energies ( $G_c$ , hartree) with *ZPE* and thermal corrections, and relative energies ( $E_r$ ,  $\text{kJ mol}^{-1}$ ) and relative Gibbs free energies ( $G_r$ ,  $\text{kJ mol}^{-1}$ ) relative to the reactants for the reaction stage (ii) of  $\text{HCOO}^- + {}^6[\text{Ru}(\text{PPh}_3)]^{3+} \rightarrow {}^6[\text{RuH}]^{2+} + \text{PPh}_3 + \text{CO}_2$  at M06/def2TZVP, 6-311++G(d,p) level in aqueous solution.

| Species                                                                                                                      | <i>ZPE</i> | $E_c$       | $G_0$    | $G_c$       | $E_r$ | $G_r$ |
|------------------------------------------------------------------------------------------------------------------------------|------------|-------------|----------|-------------|-------|-------|
| ${}^6[\text{Ru}(\text{PPh}_3)]^{3+}$                                                                                         | 0.27415    | -1129.92479 | 0.19644  | -1130.00251 |       |       |
| PPh <sub>3</sub>                                                                                                             | 0.27244    | -1035.47240 | 0.20382  | -1035.54102 |       |       |
| NEt <sub>3</sub>                                                                                                             | 0.20387    | -292.05597  | 0.15681  | -292.10303  |       |       |
| $[\text{HNEt}_3]^+$                                                                                                          | 0.21950    | -292.50499  | 0.17264  | -292.55185  |       |       |
| PY                                                                                                                           | 0.08809    | -248.07271  | 0.05210  | -248.10871  |       |       |
| LA                                                                                                                           | 0.12706    | -420.80704  | 0.07904  | -420.85507  |       |       |
| HCOOH                                                                                                                        | 0.03342    | -189.70312  | 0.00298  | -189.73356  |       |       |
| H <sub>2</sub>                                                                                                               | 0.00981    | -1.15796    | -0.00228 | -1.17005    |       |       |
| CO <sub>2</sub>                                                                                                              | 0.01180    | -188.54399  | -0.01351 | -188.56930  |       |       |
| ${}^6[\text{Ru}(\text{PPh}_3)]^{3+} + \text{PPh}_3 + \text{NEt}_3 + \text{PY} + \text{LA} + \text{HCOOH} + \text{H}_2$       | 1.00884    | -3317.19399 | 0.68891  | -3317.51393 | 0.0   | 0.0   |
| HCOO <sup>-</sup>                                                                                                            | 0.02057    | -189.26496  | -0.00933 | -189.29486  |       |       |
| $\text{HCOO}^- + {}^6[\text{Ru}(\text{PPh}_3)]^{3+} + \text{PPh}_3 + \text{PY} + \text{LA} + \text{H}_2 + [\text{HNEt}_3]^+$ | 1.01162    | -3317.20485 | 0.69242  | -3317.52406 | -28.5 | -26.6 |
| ${}^6[2\text{-F-S-IM1}]^{2+}$                                                                                                | 0.02222    | -283.72747  | -0.01894 | -283.76864  |       |       |
| ${}^6[2\text{-F-S-IM1}]^{2+} + 2*\text{PPh}_3 + \text{PY} + \text{LA} + \text{H}_2 + [\text{HNEt}_3]^+$                      | 1.01156    | -3317.21497 | 0.69018  | -3317.53635 | -55.1 | -58.9 |
| ${}^6[2\text{-F-S-TS1}]^{2+}$                                                                                                | 0.01698    | -283.69093  | -0.02481 | -283.73272  |       |       |
| ${}^6[2\text{-F-S-TS1}]^{2+} + 2*\text{PPh}_3 + \text{PY} + \text{LA} + \text{H}_2 + [\text{HNEt}_3]^+$                      | 1.00632    | -3317.17843 | 0.68431  | -3317.50043 | 40.9  | 35.4  |
| ${}^6[2\text{-F-S-IM2}]^{2+}$                                                                                                | 0.01866    | -283.70367  | -0.02233 | -283.74466  |       |       |
| ${}^6[2\text{-F-S-IM2}]^{2+} + 2*\text{PPh}_3 + \text{PY} + \text{LA} + \text{H}_2 + [\text{HNEt}_3]^+$                      | 1.00800    | -3317.19117 | 0.68680  | -3317.51237 | 7.4   | 4.1   |
| ${}^6[\text{RuH}]^{2+}$                                                                                                      | 0.00420    | -95.16229   | -0.02229 | -95.18878   |       |       |
| ${}^6[\text{RuH}]^{2+} + 2*\text{PPh}_3 + \text{PY} + \text{LA} + \text{H}_2 + [\text{HNEt}_3]^+ + \text{CO}_2$              | 1.00533    | -3317.19378 | 0.67333  | -3317.52579 | 0.5   | -31.1 |

**Table S14.** Zero-point energies ( $ZPE$ , hartree), thermal correction to Gibbs free energy ( $G_0$ , hartree), total energies ( $E_c$ , hartree) corrected by  $ZPE$ , Sum of electronic and thermal free energies ( $G_c$ , hartree) with  $ZPE$  and thermal corrections, and relative energies ( $E_r$ , kJ mol<sup>-1</sup>) and relative Gibbs free energies ( $G_r$ , kJ mol<sup>-1</sup>) relative to the reactants for the reaction stage (iii) of  ${}^6[\text{RuH}]^{2+} + \text{LA} \rightarrow {}^6[\text{RuOH}]^{2+} + \text{GVL}$  through the hydrogenation of ketone carbonyl at M06/def2TZVP, 6-311++G(d,p) level in aqueous solution.

| Species                                                                                                                | $ZPE$   | $E_c$       | $G_0$    | $G_c$       | $E_r$ | $G_r$  |
|------------------------------------------------------------------------------------------------------------------------|---------|-------------|----------|-------------|-------|--------|
| ${}^6[\text{Ru}(\text{PPh}_3)]^{3+}$                                                                                   | 0.27415 | -1129.92479 | 0.19644  | -1130.00251 |       |        |
| PPh <sub>3</sub>                                                                                                       | 0.27244 | -1035.47240 | 0.20382  | -1035.54102 |       |        |
| NEt <sub>3</sub>                                                                                                       | 0.20387 | -292.05597  | 0.15681  | -292.10303  |       |        |
| $[\text{HNEt}_3]^+$                                                                                                    | 0.21950 | -292.50499  | 0.17264  | -292.55185  |       |        |
| PY                                                                                                                     | 0.08809 | -248.07271  | 0.05210  | -248.10871  |       |        |
| LA                                                                                                                     | 0.12706 | -420.80704  | 0.07904  | -420.85507  |       |        |
| HCOOH                                                                                                                  | 0.03342 | -189.70312  | 0.00298  | -189.73356  |       |        |
| H <sub>2</sub>                                                                                                         | 0.00981 | -1.15796    | -0.00228 | -1.17005    |       |        |
| CO <sub>2</sub>                                                                                                        | 0.01180 | -188.54399  | -0.01351 | -188.56930  |       |        |
| GVL                                                                                                                    | 0.12519 | -345.57698  | 0.08391  | -345.61826  |       |        |
| ${}^6[\text{Ru}(\text{PPh}_3)]^{3+} + \text{PPh}_3 + \text{NEt}_3 + \text{PY} + \text{LA} + \text{HCOOH} + \text{H}_2$ | 1.00884 | -3317.19399 | 0.68891  | -3317.51393 | 0.0   | 0.0    |
| ${}^6[\text{RuH}]^{2+}$                                                                                                | 0.00420 | -95.16229   | -0.02229 | -95.18878   |       |        |
| ${}^6[\text{RuH}]^{2+} + 2*\text{PPh}_3 + \text{PY} + \text{LA} + \text{H}_2 + [\text{HNEt}_3]^+ + \text{CO}_2$        | 1.00533 | -3317.19378 | 0.67333  | -3317.52579 | 0.5   | -31.1  |
| ${}^6[3\text{-F-K-IM4}]^{2+}$                                                                                          | 0.13541 | -515.96925  | 0.07797  | -516.02670  |       |        |
| ${}^6[3\text{-F-K-IM4}]^{2+} + 2*\text{PPh}_3 + \text{PY} + \text{H}_2 + [\text{HNEt}_3]^+ + \text{CO}_2$              | 1.00948 | -3317.19371 | 0.69455  | -3317.50864 | 0.7   | 13.9   |
| ${}^6[3\text{-F-K-TS2}]^{2+}$                                                                                          | 0.13570 | -515.95439  | 0.07955  | -516.01053  |       |        |
| ${}^6[3\text{-F-K-TS2}]^{2+} + 2*\text{PPh}_3 + \text{PY} + \text{H}_2 + [\text{HNEt}_3]^+ + \text{CO}_2$              | 1.00977 | -3317.17884 | 0.69613  | -3317.49247 | 39.8  | 56.3   |
| ${}^6[3\text{-F-K-IM5}]^{2+}$                                                                                          | 0.14037 | -516.00242  | 0.08295  | -516.05984  |       |        |
| ${}^6[3\text{-F-K-IM5}]^{2+} + 2*\text{PPh}_3 + \text{PY} + \text{H}_2 + [\text{HNEt}_3]^+ + \text{CO}_2$              | 1.01444 | -3317.22687 | 0.69953  | -3317.54178 | -86.3 | -73.1  |
| ${}^6[3\text{-F-K-IM6}]^{2+}$                                                                                          | 0.14086 | -516.00375  | 0.08621  | -516.05840  |       |        |
| ${}^6[3\text{-F-K-IM6}]^{2+} + 2*\text{PPh}_3 + \text{PY} + \text{H}_2 + [\text{HNEt}_3]^+ + \text{CO}_2$              | 1.01493 | -3317.22821 | 0.70280  | -3317.54033 | -89.8 | -69.3  |
| ${}^6[3\text{-F-K-TS3}]^{2+}$                                                                                          | 0.14018 | -515.97845  | 0.08921  | -516.02941  |       |        |
| ${}^6[3\text{-F-K-TS3}]^{2+} + 2*\text{PPh}_3 + \text{PY} + \text{H}_2 + [\text{HNEt}_3]^+ + \text{CO}_2$              | 1.01425 | -3317.20290 | 0.70579  | -3317.51135 | -23.4 | 6.8    |
| ${}^6[3\text{-F-K-IM7}]^{2+}$                                                                                          | 0.14233 | -515.98966  | 0.08947  | -516.04252  |       |        |
| ${}^6[3\text{-F-K-IM7}]^{2+} + 2*\text{PPh}_3 + \text{PY} + \text{H}_2 + [\text{HNEt}_3]^+ + \text{CO}_2$              | 1.01641 | -3317.21411 | 0.70605  | -3317.52446 | -52.8 | -27.6  |
| ${}^6[3\text{-F-K-IM8}]^{2+}$                                                                                          | 0.14165 | -515.98835  | 0.08862  | -516.04138  |       |        |
| ${}^6[3\text{-F-K-IM8}]^{2+} + 2*\text{PPh}_3 + \text{PY} + \text{H}_2 + [\text{HNEt}_3]^+ + \text{CO}_2$              | 1.01572 | -3317.21280 | 0.70521  | -3317.52332 | -49.4 | -24.7  |
| ${}^6[3\text{-F-K-TS4}]^{2+}$                                                                                          | 0.13977 | -515.97382  | 0.08768  | -516.02591  |       |        |
| ${}^6[3\text{-F-K-TS4}]^{2+} + 2*\text{PPh}_3 + \text{PY} + \text{H}_2 + [\text{HNEt}_3]^+ + \text{CO}_2$              | 1.01384 | -3317.19828 | 0.70427  | -3317.50785 | -11.3 | 16.0   |
| ${}^6[3\text{-F-K-IM9}]^{2+}$                                                                                          | 0.13998 | -516.00549  | 0.08506  | -516.06041  |       |        |
| ${}^6[3\text{-F-K-IM9}]^{2+} + 2*\text{PPh}_3 + \text{PY} + \text{H}_2 + [\text{HNEt}_3]^+ + \text{CO}_2$              | 1.01405 | -3317.22994 | 0.70164  | -3317.54235 | -94.4 | -74.6  |
| ${}^6[\text{RuOH}]^{2+}$                                                                                               | 0.01137 | -170.42314  | -0.02230 | -170.45681  |       |        |
| ${}^6[\text{RuOH}]^{2+} + 2*\text{PPh}_3 + \text{PY} + \text{H}_2 + [\text{HNEt}_3]^+ + \text{CO}_2 + \text{GVL}$      | 1.01063 | -3317.22457 | 0.67819  | -3317.55701 | -80.3 | -113.1 |
| ${}^6[3\text{-F-C-IM4}]^{2+}$                                                                                          | 0.13780 | -515.96972  | 0.08001  | -516.02750  |       |        |
| ${}^6[3\text{-F-C-IM4}]^{2+} + 2*\text{PPh}_3 + \text{PY} + \text{H}_2 + [\text{HNEt}_3]^+ + \text{CO}_2$              | 1.01187 | -3317.19417 | 0.69660  | -3317.50943 | -0.5  | 11.8   |
| ${}^6[3\text{-F-C-TS2}]^{2+}$                                                                                          | 0.13559 | -515.95117  | 0.08090  | -516.00587  |       |        |
| ${}^6[3\text{-F-C-TS2}]^{2+} + 2*\text{PPh}_3 + \text{PY} + \text{H}_2 + [\text{HNEt}_3]^+ + \text{CO}_2$              | 1.00966 | -3317.17563 | 0.69748  | -3317.48780 | 48.2  | 68.6   |

**Table S15.** Zero-point energies (*ZPE*, hartree), thermal correction to Gibbs free energy ( $G_0$ , hartree), total energies ( $E_c$ , hartree) corrected by *ZPE*, Sum of electronic and thermal free energies ( $G_c$ , hartree) with *ZPE* and thermal corrections, and relative energies ( $E_r$ ,  $\text{kJ mol}^{-1}$ ) and relative Gibbs free energies ( $G_r$ ,  $\text{kJ mol}^{-1}$ ) relative to the reactants for the reaction stage (iv) of  ${}^6[\text{RuOH}]^{2+} + \text{CO}_2 + \text{PPh}_3 \rightarrow {}^6[\text{Ru}(\text{PPh}_3)]^{3+} + \text{HCO}_3^-$  at M06/def2TZVP, 6-311++G(d,p) level in aqueous solution.

| Species                                                                                                                        | <i>ZPE</i> | $E_c$       | $G_0$    | $G_c$       | $E_r$ | $G_r$  |
|--------------------------------------------------------------------------------------------------------------------------------|------------|-------------|----------|-------------|-------|--------|
| ${}^6[\text{Ru}(\text{PPh}_3)]^{3+}$                                                                                           | 0.27415    | -1129.92479 | 0.19644  | -1130.00251 |       |        |
| PPh <sub>3</sub>                                                                                                               | 0.27244    | -1035.47240 | 0.20382  | -1035.54102 |       |        |
| NEt <sub>3</sub>                                                                                                               | 0.20387    | -292.05597  | 0.15681  | -292.10303  |       |        |
| $[\text{HNEt}_3]^+$                                                                                                            | 0.21950    | -292.50499  | 0.17264  | -292.55185  |       |        |
| PY                                                                                                                             | 0.08809    | -248.07271  | 0.05210  | -248.10871  |       |        |
| LA                                                                                                                             | 0.12706    | -420.80704  | 0.07904  | -420.85507  |       |        |
| HCOOH                                                                                                                          | 0.03342    | -189.70312  | 0.00298  | -189.73356  |       |        |
| H <sub>2</sub>                                                                                                                 | 0.00981    | -1.15796    | -0.00228 | -1.17005    |       |        |
| CO <sub>2</sub>                                                                                                                | 0.01180    | -188.54399  | -0.01351 | -188.56930  |       |        |
| GVL                                                                                                                            | 0.12519    | -345.57698  | 0.08391  | -345.61826  |       |        |
| OH <sup>-</sup>                                                                                                                | 0.00893    | -75.92761   | -0.00988 | -75.94642   |       |        |
| ${}^6[\text{Ru}(\text{PPh}_3)]^{3+} + \text{PPh}_3 + \text{NEt}_3 + \text{PY} + \text{LA} + \text{HCOOH} + \text{H}_2$         | 1.00884    | -3317.19399 | 0.68891  | -3317.51393 | 0.0   | 0.0    |
| ${}^6[\text{RuOH}]^{2+}$                                                                                                       | 0.01137    | -170.42314  | -0.02230 | -170.45681  |       |        |
| ${}^6[\text{RuOH}]^{2+} + 2*\text{PPh}_3 + \text{PY} + \text{H}_2 + [\text{HNEt}_3]^+ + \text{CO}_2 + \text{GVL}$              | 1.01063    | -3317.22457 | 0.67819  | -3317.55701 | -80.3 | -113.1 |
| OH <sup>-</sup>                                                                                                                | 0.00893    | -75.92761   | -0.00988 | -75.94642   |       |        |
| ${}^6[\text{Ru}(\text{PPh}_3)]^{3+} + \text{PPh}_3 + \text{PY} + \text{H}_2 + [\text{HNEt}_3]^+ + \text{CO}_2 + \text{GVL}$    | 1.00991    | -3317.18144 | 0.68323  | -3317.50811 | 33.0  | 15.3   |
| ${}^6[4\text{-F-C-IM11}]^{2+}$                                                                                                 | 0.02502    | -358.96581  | -0.02205 | -359.01287  |       |        |
| ${}^6[4\text{-F-C-IM11}]^{2+} + 2*\text{PPh}_3 + \text{PY} + \text{H}_2 + [\text{HNEt}_3]^+ + \text{GVL}$                      | 1.01248    | -3317.22325 | 0.69195  | -3317.54377 | -76.8 | -78.3  |
| ${}^6[4\text{-F-C-TS5}]^{2+}$                                                                                                  | 0.02497    | -358.95103  | -0.01972 | -358.99572  |       |        |
| ${}^6[4\text{-F-C-TS5}]^{2+} + 2*\text{PPh}_3 + \text{PY} + \text{H}_2 + [\text{HNEt}_3]^+ + \text{GVL}$                       | 1.01243    | -3317.20847 | 0.69428  | -3317.52662 | -38.0 | -33.3  |
| ${}^6[4\text{-F-C-IM12}]^{2+}$                                                                                                 | 0.02890    | -358.96785  | -0.01359 | -359.01034  |       |        |
| ${}^6[4\text{-F-C-IM12}]^{2+} + 2*\text{PPh}_3 + \text{PY} + \text{H}_2 + [\text{HNEt}_3]^+ + \text{GVL}$                      | 1.01636    | -3317.22529 | 0.70041  | -3317.54124 | -82.2 | -71.7  |
| HCO <sub>3</sub> <sup>-</sup>                                                                                                  | 0.02645    | -264.51134  | -0.00655 | -264.54433  |       |        |
| $\text{HCO}_3^- + {}^6[\text{Ru}(\text{PPh}_3)]^{3+} + \text{PPh}_3 + \text{PY} + \text{H}_2 + [\text{HNEt}_3]^+ + \text{GVL}$ | 1.01562    | -3317.22117 | 0.70007  | -3317.53672 | -71.4 | -59.8  |

**Table S16.** Zero-point energies (*ZPE*, hartree), thermal correction to Gibbs free energy (*G*<sub>0</sub>, hartree), total energies (*E*<sub>c</sub>, hartree) corrected by *ZPE*, Sum of electronic and thermal free energies (*G*<sub>c</sub>, hartree) with *ZPE* and thermal corrections, and relative energies (*E*<sub>r</sub>, kJ mol<sup>-1</sup>) and relative Gibbs free energies (*G*<sub>r</sub>, kJ mol<sup>-1</sup>) relative to the reactants for the reaction stage (v) of HCO<sub>3</sub><sup>-</sup> + [HL]<sup>+</sup> → L + CO<sub>2</sub> + H<sub>2</sub>O (L = PPh<sub>3</sub>, NEt<sub>3</sub>, and PY) at M06/def2TZVP, 6-311++G(d,p) level in aqueous solution.

| Species                                                                                                                                                                             | <i>ZPE</i> | <i>E</i> <sub>c</sub> | <i>G</i> <sub>0</sub> | <i>G</i> <sub>c</sub> | <i>E</i> <sub>r</sub> | <i>G</i> <sub>r</sub> |
|-------------------------------------------------------------------------------------------------------------------------------------------------------------------------------------|------------|-----------------------|-----------------------|-----------------------|-----------------------|-----------------------|
| <sup>6</sup> [Ru(PPh <sub>3</sub> ) <sub>3</sub> ] <sup>3+</sup>                                                                                                                    | 0.27415    | -1129.92479           | 0.19644               | -1130.00251           |                       |                       |
| PPh <sub>3</sub>                                                                                                                                                                    | 0.27244    | -1035.47240           | 0.20382               | -1035.54102           |                       |                       |
| [HPPH <sub>3</sub> ] <sup>+</sup>                                                                                                                                                   | 0.28366    | -1035.91017           | 0.21535               | -1035.97848           |                       |                       |
| NEt <sub>3</sub>                                                                                                                                                                    | 0.20387    | -292.05597            | 0.15681               | -292.10303            |                       |                       |
| [HNEt <sub>3</sub> ] <sup>+</sup>                                                                                                                                                   | 0.21950    | -292.50499            | 0.17264               | -292.55185            |                       |                       |
| PY                                                                                                                                                                                  | 0.08809    | -248.07271            | 0.05210               | -248.10871            |                       |                       |
| [HPY] <sup>+</sup>                                                                                                                                                                  | 0.10172    | -248.51019            | 0.06550               | -248.54641            |                       |                       |
| LA                                                                                                                                                                                  | 0.12706    | -420.80704            | 0.07904               | -420.85507            |                       |                       |
| HCOOH                                                                                                                                                                               | 0.03342    | -189.70312            | 0.00298               | -189.73356            |                       |                       |
| H <sub>2</sub>                                                                                                                                                                      | 0.00981    | -1.15796              | -0.00228              | -1.17005              |                       |                       |
| CO <sub>2</sub>                                                                                                                                                                     | 0.01180    | -188.54399            | -0.01351              | -188.56930            |                       |                       |
| GVL                                                                                                                                                                                 | 0.12519    | -345.57698            | 0.08391               | -345.61826            |                       |                       |
| H <sub>2</sub> O                                                                                                                                                                    | 0.02128    | -76.41073             | -0.00070              | -76.43271             |                       |                       |
| <sup>6</sup> [Ru(PPh <sub>3</sub> ) <sub>3</sub> ] <sup>3+</sup> + PPh <sub>3</sub> + NEt <sub>3</sub> + PY + LA + HCOOH + H <sub>2</sub>                                           | 1.00884    | -3317.19399           | 0.68891               | -3317.51393           | 0.0                   | 0.0                   |
| HCO <sub>3</sub> <sup>-</sup>                                                                                                                                                       | 0.02645    | -264.51134            | -0.00655              | -264.54433            |                       |                       |
| HCO <sub>3</sub> <sup>-</sup> + <sup>6</sup> [Ru(PPh <sub>3</sub> ) <sub>3</sub> ] <sup>3+</sup> + [HPPH <sub>3</sub> ] <sup>+</sup> + PY + H <sub>2</sub> + NEt <sub>3</sub> + GVL | 1.01122    | -3317.20993           | 0.69579               | -3317.52535           | -41.8                 | -30.0                 |
| 5-B-P-IM1                                                                                                                                                                           | 0.31186    | -1300.43267           | 0.22889               | -1300.51563           |                       |                       |
| 5-B-P-IM1 + <sup>6</sup> [Ru(PPh <sub>3</sub> ) <sub>3</sub> ] <sup>3+</sup> + PY + H <sub>2</sub> + NEt <sub>3</sub> + GVL                                                         | 1.01297    | -3317.22108           | 0.71587               | -3317.51818           | -71.1                 | -11.1                 |
| 5-B-P-TS1                                                                                                                                                                           | 0.30690    | -1300.40860           | 0.22524               | -1300.49026           |                       |                       |
| 5-B-P-TS1 + <sup>6</sup> [Ru(PPh <sub>3</sub> ) <sub>3</sub> ] <sup>3+</sup> + PY + H <sub>2</sub> + NEt <sub>3</sub> + GVL                                                         | 1.00802    | -3317.19701           | 0.71222               | -3317.49281           | -7.9                  | 55.5                  |
| 5-B-P-IM2                                                                                                                                                                           | 0.31032    | -1300.44082           | 0.22668               | -1300.52446           |                       |                       |
| 5-B-P-IM2 + <sup>6</sup> [Ru(PPh <sub>3</sub> ) <sub>3</sub> ] <sup>3+</sup> + PY + H <sub>2</sub> + NEt <sub>3</sub> + GVL                                                         | 1.01143    | -3317.22924           | 0.71367               | -3317.52700           | -92.5                 | -34.3                 |
| HCO <sub>3</sub> <sup>-</sup>                                                                                                                                                       | 0.02645    | -264.51134            | -0.00655              | -264.54433            |                       |                       |
| HCO <sub>3</sub> <sup>-</sup> + <sup>6</sup> [Ru(PPh <sub>3</sub> ) <sub>3</sub> ] <sup>3+</sup> + PPh <sub>3</sub> + PY + H <sub>2</sub> + [HNEt <sub>3</sub> ] <sup>+</sup> + GVL | 1.01562    | -3317.22117           | 0.70007               | -3317.53672           | -71.4                 | -59.8                 |
| 5-B-N-IM1                                                                                                                                                                           | 0.24732    | -557.03079            | 0.18682               | -557.09129            |                       |                       |
| 5-B-N-IM1 + <sup>6</sup> [Ru(PPh <sub>3</sub> ) <sub>3</sub> ] <sup>3+</sup> + PPh <sub>3</sub> + PY + H <sub>2</sub> + GVL                                                         | 1.01700    | -3317.23563           | 0.72080               | -3317.53183           | -109.3                | -47.0                 |
| 5-B-N-TS1                                                                                                                                                                           | 0.24103    | -557.00196            | 0.18183               | -557.06116            |                       |                       |
| 5-B-N-TS1 + <sup>6</sup> [Ru(PPh <sub>3</sub> ) <sub>3</sub> ] <sup>3+</sup> + PPh <sub>3</sub> + PY + H <sub>2</sub> + GVL                                                         | 1.01070    | -3317.20681           | 0.71582               | -3317.50170           | -33.7                 | 32.1                  |
| 5-B-N-IM2                                                                                                                                                                           | 0.24340    | -557.01940            | 0.18153               | -557.08127            |                       |                       |
| 5-B-N-IM2 + <sup>6</sup> [Ru(PPh <sub>3</sub> ) <sub>3</sub> ] <sup>3+</sup> + PPh <sub>3</sub> + PY + H <sub>2</sub> + GVL                                                         | 1.01307    | -3317.22425           | 0.71551               | -3317.52181           | -79.4                 | -20.7                 |
| HCO <sub>3</sub> <sup>-</sup>                                                                                                                                                       | 0.02645    | -264.51134            | -0.00655              | -264.54433            |                       |                       |
| HCO <sub>3</sub> <sup>-</sup> + <sup>6</sup> [Ru(PPh <sub>3</sub> ) <sub>3</sub> ] <sup>3+</sup> + PPh <sub>3</sub> + [HPY] <sup>+</sup> + H <sub>2</sub> + NEt <sub>3</sub> + GVL  | 1.01362    | -3317.20963           | 0.69765               | -3317.52560           | -41.1                 | -30.6                 |
| 5-B-Y-IM1                                                                                                                                                                           | 0.12935    | -513.02994            | 0.07597               | -513.08332            |                       |                       |
| 5-B-Y-IM1 + <sup>6</sup> [Ru(PPh <sub>3</sub> ) <sub>3</sub> ] <sup>3+</sup> + PPh <sub>3</sub> + H <sub>2</sub> + NEt <sub>3</sub> + GVL                                           | 1.01481    | -3317.21804           | 0.71467               | -3317.51818           | -63.1                 | -11.1                 |
| 5-B-Y-TS1                                                                                                                                                                           | 0.12432    | -513.01262            | 0.07180               | -513.06514            |                       |                       |
| 5-B-Y-TS1 + <sup>6</sup> [Ru(PPh <sub>3</sub> ) <sub>3</sub> ] <sup>3+</sup> + PPh <sub>3</sub> + H <sub>2</sub> + NEt <sub>3</sub> + GVL                                           | 1.00977    | -3317.20072           | 0.71050               | -3317.49999           | -17.7                 | 36.6                  |
| 5-B-Y-IM2                                                                                                                                                                           | 0.12575    | -513.03316            | 0.06671               | -513.09221            |                       |                       |
| 5-B-Y-IM2 + <sup>6</sup> [Ru(PPh <sub>3</sub> ) <sub>3</sub> ] <sup>3+</sup> + PPh <sub>3</sub> + H <sub>2</sub> + NEt <sub>3</sub> + GVL                                           | 1.01120    | -3317.22127           | 0.70541               | -3317.52707           | -71.6                 | -34.5                 |
| CO <sub>2</sub>                                                                                                                                                                     | 0.01180    | -188.54399            | -0.01351              | -188.56930            |                       |                       |
| CO <sub>2</sub> + <sup>6</sup> [Ru(PPh <sub>3</sub> ) <sub>3</sub> ] <sup>3+</sup> + PPh <sub>3</sub> + PY + NEt <sub>3</sub> + H <sub>2</sub> + GVL + H <sub>2</sub> O             | 1.00663    | -3317.21554           | 0.67659               | -3317.54557           | -56.6                 | -83.1                 |

**Table S17.** Zero-point energies (*ZPE*, hartree), thermal correction to Gibbs free energy ( $G_0$ , hartree), total energies ( $E_c$ , hartree) corrected by *ZPE*, Sum of electronic and thermal free energies ( $G_c$ , hartree) with *ZPE* and thermal corrections, and relative energies ( $E_r$ ,  $\text{kJ mol}^{-1}$ ) and relative Gibbs free energies ( $G_r$ ,  $\text{kJ mol}^{-1}$ ) relative to the reactants for the reaction stage (vi) of  ${}^6[\text{RuH}]^{2+} + \text{LA} \rightarrow {}^6[\text{RuOH}]^{2+} + \text{OT}$  through the hydrogenation of carboxyl carbonyl at M06/def2TZVP, 6-311++G(d,p) level in aqueous solution.

| Species                                                                                                                | <i>ZPE</i> | $E_c$       | $G_0$    | $G_c$       | $E_r$ | $G_r$ |
|------------------------------------------------------------------------------------------------------------------------|------------|-------------|----------|-------------|-------|-------|
| ${}^6[\text{Ru}(\text{PPh}_3)]^{3+}$                                                                                   | 0.27415    | -1129.92479 | 0.19644  | -1130.00251 |       |       |
| $\text{PPh}_3$                                                                                                         | 0.27244    | -1035.47240 | 0.20382  | -1035.54102 |       |       |
| $[\text{HPPH}_3]^+$                                                                                                    | 0.28366    | -1035.91017 | 0.21535  | -1035.97848 |       |       |
| $\text{NEt}_3$                                                                                                         | 0.20387    | -292.05597  | 0.15681  | -292.10303  |       |       |
| $[\text{HNEt}_3]^+$                                                                                                    | 0.21950    | -292.50499  | 0.17264  | -292.55185  |       |       |
| $\text{PY}$                                                                                                            | 0.08809    | -248.07271  | 0.05210  | -248.10871  |       |       |
| $[\text{HPY}]^+$                                                                                                       | 0.10172    | -248.51019  | 0.06550  | -248.54641  |       |       |
| $\text{LA}$                                                                                                            | 0.12706    | -420.80704  | 0.07904  | -420.85507  |       |       |
| $\text{HCOOH}$                                                                                                         | 0.03342    | -189.70312  | 0.00298  | -189.73356  |       |       |
| $\text{H}_2$                                                                                                           | 0.00981    | -1.15796    | -0.00228 | -1.17005    |       |       |
| $\text{CO}_2$                                                                                                          | 0.01180    | -188.54399  | -0.01351 | -188.56930  |       |       |
| $\text{OT}$                                                                                                            | 0.12081    | -345.55701  | 0.07452  | -345.60330  |       |       |
| ${}^6[\text{Ru}(\text{PPh}_3)]^{3+} + \text{PPh}_3 + \text{NEt}_3 + \text{PY} + \text{LA} + \text{HCOOH} + \text{H}_2$ | 1.00884    | -3317.19399 | 0.68891  | -3317.51393 | 0.0   | 0.0   |
| ${}^6[\text{RuH}]^{2+}$                                                                                                | 0.00420    | -95.16229   | -0.02229 | -95.18878   |       |       |
| ${}^6[\text{RuH}]^{2+} + 2*\text{PPh}_3 + \text{PY} + \text{LA} + \text{H}_2 + [\text{HNEt}_3]^+ + \text{CO}_2$        | 1.00533    | -3317.19378 | 0.67333  | -3317.52579 | 0.5   | -31.1 |
| ${}^6[3\text{-F-C-IM4}]^{2+}$                                                                                          | 0.13780    | -515.96972  | 0.08001  | -516.02750  |       |       |
| ${}^6[3\text{-F-C-IM4}]^{2+} + 2*\text{PPh}_3 + \text{PY} + \text{H}_2 + [\text{HNEt}_3]^+ + \text{CO}_2$              | 1.01187    | -3317.19417 | 0.69660  | -3317.50943 | -0.5  | 11.8  |
| ${}^6[6\text{-F-O-TS2}]^{2+}$                                                                                          | 0.13485    | -515.94716  | 0.07718  | -516.00483  |       |       |
| ${}^6[6\text{-F-O-TS2}]^{2+} + 2*\text{PPh}_3 + \text{PY} + \text{H}_2 + [\text{HNEt}_3]^+ + \text{CO}_2$              | 1.00893    | -3317.17161 | 0.69376  | -3317.48677 | 58.8  | 71.3  |
| ${}^6[6\text{-F-O-IM5}]^{2+}$                                                                                          | 0.13940    | -515.98718  | 0.07994  | -516.04664  |       |       |
| ${}^6[6\text{-F-O-IM5}]^{2+} + 2*\text{PPh}_3 + \text{PY} + \text{H}_2 + [\text{HNEt}_3]^+ + \text{CO}_2$              | 1.01347    | -3317.21163 | 0.69653  | -3317.52857 | -46.3 | -38.4 |
| ${}^6[6\text{-F-O-TS3}]^{2+}$                                                                                          | 0.13572    | -515.96212  | 0.07863  | -516.01920  |       |       |
| ${}^6[6\text{-F-O-TS3}]^{2+} + 2*\text{PPh}_3 + \text{PY} + \text{H}_2 + [\text{HNEt}_3]^+ + \text{CO}_2$              | 1.00979    | -3317.18657 | 0.69522  | -3317.50114 | 19.5  | 33.6  |
| ${}^6[6\text{-F-O-IM6}]^{2+}$                                                                                          | 0.13497    | -515.98151  | 0.07362  | -516.04285  |       |       |
| ${}^6[6\text{-F-O-IM6}]^{2+} + 2*\text{PPh}_3 + \text{PY} + \text{H}_2 + [\text{HNEt}_3]^+ + \text{CO}_2$              | 1.00904    | -3317.20596 | 0.69020  | -3317.52479 | -31.4 | -28.5 |
| ${}^6[\text{RuOH}]^{2+}$                                                                                               | 0.01137    | -170.42314  | -0.02230 | -170.45681  |       |       |
| ${}^6[\text{RuOH}]^{2+} + 2*\text{PPh}_3 + \text{PY} + \text{H}_2 + [\text{HNEt}_3]^+ + \text{CO}_2 + \text{OT}$       | 1.00625    | -3317.20460 | 0.66880  | -3317.54205 | -27.9 | -73.8 |

**Table S18.** Zero-point energies (*ZPE*, hartree), thermal correction to Gibbs free energy (*G*<sub>0</sub>, hartree), total energies (*E*<sub>c</sub>, hartree) corrected by *ZPE*, Sum of electronic and thermal free energies (*G*<sub>c</sub>, hartree) with *ZPE* and thermal corrections, and relative energies (*E*<sub>r</sub>, kJ mol<sup>-1</sup>) and relative Gibbs free energies (*G*<sub>r</sub>, kJ mol<sup>-1</sup>) relative to the reactants for the reaction stage (vii) of <sup>6</sup>[RuH]<sup>2+</sup> + LA + [HNEt<sub>3</sub>]<sup>+</sup> + PPh<sub>3</sub> → <sup>6</sup>[Ru(PPh<sub>3</sub>)]<sup>3+</sup> + NEt<sub>3</sub> + MFD through the hydrogenation of carboxyl carbonyl at M06/def2TZVP, 6-311++G(d,p) level in aqueous solution.

| Species                                                                                                                                                                      | <i>ZPE</i> | <i>E</i> <sub>c</sub> | <i>G</i> <sub>0</sub> | <i>G</i> <sub>c</sub> | <i>E</i> <sub>r</sub> | <i>G</i> <sub>r</sub> |
|------------------------------------------------------------------------------------------------------------------------------------------------------------------------------|------------|-----------------------|-----------------------|-----------------------|-----------------------|-----------------------|
| <sup>6</sup> [Ru(PPh <sub>3</sub> )] <sup>3+</sup>                                                                                                                           | 0.27415    | -1129.92479           | 0.19644               | -1130.00251           |                       |                       |
| PPh <sub>3</sub>                                                                                                                                                             | 0.27244    | -1035.47240           | 0.20382               | -1035.54102           |                       |                       |
| [HPPPh <sub>3</sub> ] <sup>+</sup>                                                                                                                                           | 0.28366    | -1035.91017           | 0.21535               | -1035.97848           |                       |                       |
| NEt <sub>3</sub>                                                                                                                                                             | 0.20387    | -292.05597            | 0.15681               | -292.10303            |                       |                       |
| [HNEt <sub>3</sub> ] <sup>+</sup>                                                                                                                                            | 0.21950    | -292.50499            | 0.17264               | -292.55185            |                       |                       |
| PY                                                                                                                                                                           | 0.08809    | -248.07271            | 0.05210               | -248.10871            |                       |                       |
| [HPY] <sup>+</sup>                                                                                                                                                           | 0.10172    | -248.51019            | 0.06550               | -248.54641            |                       |                       |
| LA                                                                                                                                                                           | 0.12706    | -420.80704            | 0.07904               | -420.85507            |                       |                       |
| HCOOH                                                                                                                                                                        | 0.03342    | -189.70312            | 0.00298               | -189.73356            |                       |                       |
| H <sub>2</sub>                                                                                                                                                               | 0.00981    | -1.15796              | -0.00228              | -1.17005              |                       |                       |
| CO <sub>2</sub>                                                                                                                                                              | 0.01180    | -188.54399            | -0.01351              | -188.56930            |                       |                       |
| MFD                                                                                                                                                                          | 0.15379    | -421.96692            | 0.10937               | -422.01134            |                       |                       |
| <sup>6</sup> [Ru(PPh <sub>3</sub> )] <sup>3+</sup> + PPh <sub>3</sub> + NEt <sub>3</sub> + PY + LA + HCOOH + H <sub>2</sub>                                                  | 1.00884    | -3317.19399           | 0.68891               | -3317.51393           | 0.0                   | 0.0                   |
| <sup>6</sup> [RuH] <sup>2+</sup>                                                                                                                                             | 0.00420    | -95.16229             | -0.02229              | -95.18878             |                       |                       |
| <sup>6</sup> [RuH] <sup>2+</sup> + 2*PPh <sub>3</sub> + PY + LA + H <sub>2</sub> + [HNEt <sub>3</sub> ] <sup>+</sup> + CO <sub>2</sub>                                       | 1.00533    | -3317.19378           | 0.67333               | -3317.52579           | 0.5                   | -31.1                 |
| <sup>6</sup> [3-F-C-IM4] <sup>2+</sup>                                                                                                                                       | 0.13780    | -515.96972            | 0.08001               | -516.02750            |                       |                       |
| <sup>6</sup> [3-F-C-IM4] <sup>2+</sup> + 2*PPh <sub>3</sub> + PY + H <sub>2</sub> + [HNEt <sub>3</sub> ] <sup>+</sup> + CO <sub>2</sub>                                      | 1.01187    | -3317.19417           | 0.69660               | -3317.50943           | -0.5                  | 11.8                  |
| <sup>6</sup> [6-F-O-TS2] <sup>2+</sup>                                                                                                                                       | 0.13485    | -515.94716            | 0.07718               | -516.00483            |                       |                       |
| <sup>6</sup> [6-F-O-TS2] <sup>2+</sup> + 2*PPh <sub>3</sub> + PY + H <sub>2</sub> + [HNEt <sub>3</sub> ] <sup>+</sup> + CO <sub>2</sub>                                      | 1.00893    | -3317.17161           | 0.69376               | -3317.48677           | 58.8                  | 71.3                  |
| <sup>6</sup> [6-F-O-IM5] <sup>2+</sup>                                                                                                                                       | 0.13940    | -515.98718            | 0.07994               | -516.04664            |                       |                       |
| <sup>6</sup> [6-F-O-IM5] <sup>2+</sup> + 2*PPh <sub>3</sub> + PY + H <sub>2</sub> + [HNEt <sub>3</sub> ] <sup>+</sup> + CO <sub>2</sub>                                      | 1.01347    | -3317.21163           | 0.69653               | -3317.52857           | -46.3                 | -38.4                 |
| <sup>6</sup> [7-F-M-IM6] <sup>2+</sup>                                                                                                                                       | 0.14032    | -515.98897            | 0.08483               | -516.04445            |                       |                       |
| <sup>6</sup> [7-F-M-IM6] <sup>2+</sup> + 2*PPh <sub>3</sub> + PY + H <sub>2</sub> + [HNEt <sub>3</sub> ] <sup>+</sup> + CO <sub>2</sub>                                      | 1.01439    | -3317.21342           | 0.70141               | -3317.52639           | -51.0                 | -32.7                 |
| <sup>6</sup> [7-F-M-TS3] <sup>2+</sup>                                                                                                                                       | 0.13959    | -515.97139            | 0.08624               | -516.02474            |                       |                       |
| <sup>6</sup> [7-F-M-TS3] <sup>2+</sup> + 2*PPh <sub>3</sub> + PY + H <sub>2</sub> + [HNEt <sub>3</sub> ] <sup>+</sup> + CO <sub>2</sub>                                      | 1.01366    | -3317.19584           | 0.70282               | -3317.50668           | -4.9                  | 19.0                  |
| <sup>6</sup> [7-F-M-IM7] <sup>2+</sup>                                                                                                                                       | 0.14262    | -515.98518            | 0.08943               | -516.03837            |                       |                       |
| <sup>6</sup> [7-F-M-IM7] <sup>2+</sup> + 2*PPh <sub>3</sub> + PY + H <sub>2</sub> + [HNEt <sub>3</sub> ] <sup>+</sup> + CO <sub>2</sub>                                      | 1.01669    | -3317.20963           | 0.70602               | -3317.52030           | -41.1                 | -16.7                 |
| [7-F-M-IM8] <sup>-</sup>                                                                                                                                                     | 0.13908    | -421.49519            | 0.09502               | -421.53925            |                       |                       |
| [7-F-M-IM8] <sup>-</sup> + <sup>6</sup> [Ru(PPh <sub>3</sub> )] <sup>3+</sup> + PPh <sub>3</sub> + PY + H <sub>2</sub> + [HNEt <sub>3</sub> ] <sup>+</sup> + CO <sub>2</sub> | 1.01487    | -3317.17204           | 0.70423               | -3317.48268           | 57.6                  | 82.0                  |
| 7-F-M-IM9                                                                                                                                                                    | 0.35886    | -714.02138            | 0.28842               | -714.09181            |                       |                       |
| 7-F-M-IM9 + <sup>6</sup> [Ru(PPh <sub>3</sub> )] <sup>3+</sup> + PPh <sub>3</sub> + PY + H <sub>2</sub> + CO <sub>2</sub>                                                    | 1.01514    | -3317.19324           | 0.72499               | -3317.48339           | 2.0                   | 80.2                  |
| 7-F-M-TS4                                                                                                                                                                    | 0.35578    | -714.02324            | 0.28912               | -714.08991            |                       |                       |
| 7-F-M-TS4 + <sup>6</sup> [Ru(PPh <sub>3</sub> )] <sup>3+</sup> + PPh <sub>3</sub> + PY + H <sub>2</sub> + CO <sub>2</sub>                                                    | 1.01207    | -3317.19510           | 0.72569               | -3317.48148           | -2.9                  | 85.2                  |
| 7-F-M-IM10                                                                                                                                                                   | 0.36016    | -714.03203            | 0.29067               | -714.10152            |                       |                       |
| 7-F-M-IM10 + <sup>6</sup> [Ru(PPh <sub>3</sub> )] <sup>3+</sup> + PPh <sub>3</sub> + PY + H <sub>2</sub> + CO <sub>2</sub>                                                   | 1.01645    | -3317.20389           | 0.72724               | -3317.49310           | -26.0                 | 54.7                  |
| MFD                                                                                                                                                                          | 0.15379    | -421.96692            | 0.10937               | -422.01134            |                       |                       |
| MFD + <sup>6</sup> [Ru(PPh <sub>3</sub> )] <sup>3+</sup> + PPh <sub>3</sub> + PY + H <sub>2</sub> + CO <sub>2</sub> + NEt <sub>3</sub>                                       | 1.01395    | -3317.19474           | 0.70275               | -3317.50594           | -2.0                  | 21.0                  |

**Table S19.** Zero-point energies (*ZPE*, hartree), thermal correction to Gibbs free energy ( $G_0$ , hartree), total energies ( $E_c$ , hartree) corrected by *ZPE*, Sum of electronic and thermal free energies ( $G_c$ , hartree) with *ZPE* and thermal corrections, and relative energies ( $E_r$ , kJ mol<sup>-1</sup>) and relative Gibbs free energies ( $G_r$ , kJ mol<sup>-1</sup>) relative to the reactants for the reaction stage (viii) of  ${}^6[\text{Ru}(\text{PPh}_3)]^{3+} + \text{H}_2 + \text{L} \rightarrow {}^6[\text{RuH}]^{2+} + [\text{HL}]^+ + \text{PPh}_3$  (L = PPh<sub>3</sub>, NEt<sub>3</sub>, and PY) and  ${}^6[\text{Ru}(\text{PPh}_3)]^{3+} + \text{H}_2 \rightarrow {}^6[\text{Ru}(\text{H})_2]^{3+} + \text{PPh}_3$  at M06/def2TZVP, 6-311++G(d,p) level in aqueous solution.

| Species                                                                                                                | <i>ZPE</i> | $E_c$        | $G_0$     | $G_c$        | $E_r$ | $G_r$ |
|------------------------------------------------------------------------------------------------------------------------|------------|--------------|-----------|--------------|-------|-------|
| ${}^6[\text{Ru}(\text{PPh}_3)]^{3+}$                                                                                   | 0.27415    | -1129.92479  | 0.19644   | -1130.00251  |       |       |
| PPh <sub>3</sub>                                                                                                       | 0.27244    | -1035.47240  | 0.20382   | -1035.54102  |       |       |
| [HPPh <sub>3</sub> ] <sup>+</sup>                                                                                      | 0.28366    | -1035.91017  | 0.21535   | -1035.97848  |       |       |
| NEt <sub>3</sub>                                                                                                       | 0.20387    | -292.05597   | 0.15681   | -292.10303   |       |       |
| [HNEt <sub>3</sub> ] <sup>+</sup>                                                                                      | 0.21950    | -292.50499   | 0.17264   | -292.55185   |       |       |
| PY                                                                                                                     | 0.08809    | -248.07271   | 0.05210   | -248.10871   |       |       |
| [HPY] <sup>+</sup>                                                                                                     | 0.10172    | -248.51019   | 0.06550   | -248.54641   |       |       |
| LA                                                                                                                     | 0.12706    | -420.80704   | 0.07904   | -420.85507   |       |       |
| HCOOH                                                                                                                  | 0.03342    | -189.70312   | 0.00298   | -189.73356   |       |       |
| H <sub>2</sub>                                                                                                         | 0.00981    | -1.15796     | -0.00228  | -1.17005     |       |       |
| CO <sub>2</sub>                                                                                                        | 0.01180    | -188.54399   | -0.01351  | -188.56930   |       |       |
| ${}^6[\text{Ru}(\text{PPh}_3)]^{3+} + \text{PPh}_3 + \text{NEt}_3 + \text{PY} + \text{LA} + \text{HCOOH} + \text{H}_2$ | 1.00884    | -3317.19399  | 0.68891   | -3317.51393  | 0.0   | 0.0   |
| H <sub>2</sub>                                                                                                         | 0.009806   | -1.157963    | -0.002277 | -1.170046    |       |       |
| $\text{H}_2 + {}^6[\text{Ru}(\text{PPh}_3)]^{3+} + \text{PPh}_3 + \text{NEt}_3 + \text{PY} + \text{LA} + \text{HCOOH}$ | 1.008843   | -3317.193988 | 0.688905  | -3317.513926 | 0.0   | 0.0   |
| ${}^6[\text{Ru}(\text{H}_2)]^{3+}$                                                                                     | 0.013971   | -95.588856   | -0.016603 | -95.61943    |       |       |
| ${}^6[\text{Ru}(\text{H}_2)]^{3+} + 2*\text{PPh}_3 + \text{NEt}_3 + \text{PY} + \text{LA} + \text{HCOOH}$              | 1.01129    | -3317.172487 | 0.681956  | -3317.501819 | 56.5  | 31.8  |
| ${}^6[\text{Ru}(\text{H}_2)]^{3+}$                                                                                     | 0.005147   | -95.438249   | -0.022271 | -95.465667   |       |       |
| ${}^6[\text{Ru}(\text{H}_2)]^{3+} + 2*\text{PPh}_3 + \text{NEt}_3 + \text{PY} + \text{LA} + \text{HCOOH}$              | 1.002466   | -3317.02188  | 0.676288  | -3317.348056 | 451.9 | 435.5 |
| ${}^6[\text{8-H-P-IM1}]^{3+}$                                                                                          | 0.293057   | -1131.078501 | 0.213197  | -1131.158361 |       |       |
| ${}^6[\text{8-H-P-IM1}]^{3+} + \text{PPh}_3 + \text{NEt}_3 + \text{PY} + \text{LA} + \text{HCOOH}$                     | 1.01794    | -3317.18973  | 0.70794   | -3317.49973  | 11.2  | 37.3  |
| ${}^6[\text{8-H-P-TS1}]^{3+}$                                                                                          | 0.28697    | -1131.06014  | 0.20840   | -1131.13872  |       |       |
| ${}^6[\text{8-H-P-TS1}]^{3+} + \text{PPh}_3 + \text{NEt}_3 + \text{PY} + \text{LA} + \text{HCOOH}$                     | 1.01185    | -3317.17138  | 0.70314   | -3317.48009  | 59.4  | 88.8  |
| ${}^6[\text{8-H-P-IM2}]^{3+}$                                                                                          | 0.29269    | -1131.07826  | 0.21771   | -1131.15324  |       |       |
| ${}^6[\text{8-H-P-IM2}]^{3+} + \text{PPh}_3 + \text{NEt}_3 + \text{PY} + \text{LA} + \text{HCOOH}$                     | 1.01757    | -3317.18950  | 0.71245   | -3317.49461  | 11.8  | 50.7  |
| ${}^6[\text{RuH}]^{2+}$                                                                                                | 0.00420    | -95.16229    | -0.02229  | -95.18878    |       |       |
| ${}^6[\text{RuH}]^{2+} + \text{PPh}_3 + \text{NEt}_3 + \text{PY} + \text{LA} + \text{HCOOH} + [\text{HPPh}_3]^+$       | 1.01274    | -3317.18370  | 0.68780   | -3317.50863  | 27.0  | 13.9  |
| ${}^6[\text{8-H-N-IM1}]^{3+}$                                                                                          | 0.22797    | -387.65914   | 0.17408   | -387.71303   |       |       |
| ${}^6[\text{8-H-N-IM1}]^{3+} + 2*\text{PPh}_3 + \text{PY} + \text{LA} + \text{HCOOH}$                                  | 1.02141    | -3317.18680  | 0.71582   | -3317.49239  | 18.9  | 56.5  |
| ${}^6[\text{8-H-N-TS1}]^{3+}$                                                                                          | 0.22128    | -387.63858   | 0.16380   | -387.69606   |       |       |
| ${}^6[\text{8-H-N-TS1}]^{3+} + 2*\text{PPh}_3 + \text{PY} + \text{LA} + \text{HCOOH}$                                  | 1.01472    | -3317.16624  | 0.70554   | -3317.47542  | 72.8  | 101.1 |
| ${}^6[\text{8-H-N-IM2}]^{3+}$                                                                                          | 0.22697    | -387.66630   | 0.16687   | -387.72639   |       |       |
| ${}^6[\text{8-H-N-IM2}]^{3+} + 2*\text{PPh}_3 + \text{PY} + \text{LA} + \text{HCOOH}$                                  | 1.02041    | -3317.19396  | 0.70862   | -3317.50576  | 0.1   | 21.5  |
| ${}^6[\text{RuH}]^{2+}$                                                                                                | 0.00420    | -95.16229    | -0.02229  | -95.18878    |       |       |
| ${}^6[\text{RuH}]^{2+} + 2*\text{PPh}_3 + \text{PY} + \text{LA} + \text{HCOOH} + [\text{HNEt}_3]^+$                    | 1.01715    | -3317.19494  | 0.69209   | -3317.52000  | -2.5  | -15.9 |
| ${}^6[\text{8-H-Y-IM1}]^{3+}$                                                                                          | 0.10688    | -343.66627   | 0.05929   | -343.71385   |       |       |
| ${}^6[\text{8-H-Y-IM1}]^{3+} + 2*\text{PPh}_3 + \text{NEt}_3 + \text{LA} + \text{HCOOH}$                               | 1.01610    | -3317.17719  | 0.70575   | -3317.48754  | 44.1  | 69.3  |
| ${}^6[\text{8-H-Y-TS1}]^{3+}$                                                                                          | 0.10619    | -343.64604   | 0.05710   | -343.69513   |       |       |
| ${}^6[\text{8-H-Y-TS1}]^{3+} + 2*\text{PPh}_3 + \text{NEt}_3 + \text{LA} + \text{HCOOH}$                               | 1.01542    | -3317.15696  | 0.70356   | -3317.46882  | 97.2  | 118.4 |
| ${}^6[\text{8-H-Y-IM2}]^{3+}$                                                                                          | 0.10954    | -343.66745   | 0.06248   | -343.71451   |       |       |
| ${}^6[\text{8-H-Y-IM2}]^{3+} + 2*\text{PPh}_3 + \text{NEt}_3 + \text{LA} + \text{HCOOH}$                               | 1.01877    | -3317.17837  | 0.70894   | -3317.48819  | 41.0  | 67.6  |
| ${}^6[\text{RuH}]^{2+}$                                                                                                | 0.00420    | -95.16229    | -0.02229  | -95.18878    |       |       |
| ${}^6[\text{RuH}]^{2+} + 2*\text{PPh}_3 + \text{NEt}_3 + \text{LA} + \text{HCOOH} + [\text{HPY}]^+$                    | 1.01515    | -3317.18340  | 0.68967   | -3317.50888  | 27.8  | 13.3  |



**Table S20.** Zero-point energies (*ZPE*, hartree), thermal correction to Gibbs free energy (*G*<sub>0</sub>, hartree), total energies (*E*<sub>c</sub>, hartree) corrected by *ZPE*, Sum of electronic and thermal free energies (*G*<sub>c</sub>, hartree) with *ZPE* and thermal corrections, and relative energies (*E*<sub>r</sub>, kJ mol<sup>-1</sup>) and relative Gibbs free energies (*G*<sub>r</sub>, kJ mol<sup>-1</sup>) relative to the reactants for the reaction stage of HCOO<sup>-</sup> + LA → GVL + HCO<sub>3</sub><sup>-</sup> in presence of PPh<sub>3</sub> at M06/def2TZVP, 6-311++G(d,p) level in aqueous solution.

| Species                                                                                                                                                               | <i>ZPE</i> | <i>E</i> <sub>c</sub> | <i>G</i> <sub>0</sub> | <i>G</i> <sub>c</sub> | <i>E</i> <sub>r</sub> | <i>G</i> <sub>r</sub> |
|-----------------------------------------------------------------------------------------------------------------------------------------------------------------------|------------|-----------------------|-----------------------|-----------------------|-----------------------|-----------------------|
| <sup>6</sup> [Ru(PPh <sub>3</sub> )] <sup>3+</sup>                                                                                                                    | 0.27415    | -1129.92479           | 0.19644               | -1130.00251           |                       |                       |
| PPh <sub>3</sub>                                                                                                                                                      | 0.27244    | -1035.47240           | 0.20382               | -1035.54102           |                       |                       |
| NEt <sub>3</sub>                                                                                                                                                      | 0.20387    | -292.05597            | 0.15681               | -292.10303            |                       |                       |
| [HNEt <sub>3</sub> ] <sup>+</sup>                                                                                                                                     | 0.21950    | -292.50499            | 0.17264               | -292.55185            |                       |                       |
| PY                                                                                                                                                                    | 0.08809    | -248.07271            | 0.05210               | -248.10871            |                       |                       |
| LA                                                                                                                                                                    | 0.12706    | -420.80704            | 0.07904               | -420.85507            |                       |                       |
| HCOOH                                                                                                                                                                 | 0.03342    | -189.70312            | 0.00298               | -189.73356            |                       |                       |
| H <sub>2</sub>                                                                                                                                                        | 0.00981    | -1.15796              | -0.00228              | -1.17005              |                       |                       |
| CO <sub>2</sub>                                                                                                                                                       | 0.01180    | -188.54399            | -0.01351              | -188.56930            |                       |                       |
| GVL                                                                                                                                                                   | 0.12519    | -345.57698            | 0.08391               | -345.61826            |                       |                       |
| <sup>6</sup> [Ru(PPh <sub>3</sub> )] <sup>3+</sup> + PPh <sub>3</sub> + NEt <sub>3</sub> + PY + LA + HCOOH + H <sub>2</sub>                                           | 1.00884    | -3317.19399           | 0.68891               | -3317.51393           | 0.0                   | 0.0                   |
| HCOO <sup>-</sup>                                                                                                                                                     | 0.02057    | -189.26496            | -0.00933              | -189.29486            |                       |                       |
| HCOO <sup>-</sup> + <sup>6</sup> [Ru(PPh <sub>3</sub> )] <sup>3+</sup> + PPh <sub>3</sub> + PY + LA + H <sub>2</sub> + [HNEt <sub>3</sub> ] <sup>+</sup>              | 1.01162    | -3317.20485           | 0.69242               | -3317.52406           | -28.5                 | -26.6                 |
| P- <sup>6</sup> [2-F-S-IM1] <sup>2+</sup>                                                                                                                             | 0.29696    | -1319.22254           | 0.21134               | -1319.30816           |                       |                       |
| P- <sup>6</sup> [2-F-S-IM1] <sup>2+</sup> + PPh <sub>3</sub> + PY + LA + H <sub>2</sub> + [HNEt <sub>3</sub> ] <sup>+</sup>                                           | 1.01386    | -3317.23764           | 0.71665               | -3317.53485           | -114.6                | -54.9                 |
| P- <sup>6</sup> [2-F-S-TS1] <sup>2+</sup>                                                                                                                             | 0.29350    | -1319.18214           | 0.20922               | -1319.26641           |                       |                       |
| P- <sup>6</sup> [2-F-S-TS1] <sup>2+</sup> + PPh <sub>3</sub> + PY + LA + H <sub>2</sub> + [HNEt <sub>3</sub> ] <sup>+</sup>                                           | 1.01040    | -3317.19724           | 0.71453               | -3317.49311           | -8.5                  | 54.7                  |
| P- <sup>6</sup> [2-F-S-IM2] <sup>2+</sup>                                                                                                                             | 0.29414    | -1319.19972           | 0.20954               | -1319.28431           |                       |                       |
| P- <sup>6</sup> [2-F-S-IM2] <sup>2+</sup> + PPh <sub>3</sub> + PY + LA + H <sub>2</sub> + [HNEt <sub>3</sub> ] <sup>+</sup>                                           | 1.01104    | -3317.21482           | 0.71485               | -3317.51101           | -54.7                 | 7.7                   |
| P- <sup>6</sup> [RuH] <sup>2+</sup>                                                                                                                                   | 0.28238    | -1130.63208           | 0.20340               | -1130.71107           |                       |                       |
| P- <sup>6</sup> [RuH] <sup>2+</sup> + PPh <sub>3</sub> + PY + LA + H <sub>2</sub> + [HNEt <sub>3</sub> ] <sup>+</sup> + CO <sub>2</sub>                               | 1.01108    | -3317.19118           | 0.69520               | -3317.50706           | 7.4                   | 18.1                  |
| P- <sup>6</sup> [3-F-K-IM4] <sup>2+</sup>                                                                                                                             | 0.41221    | -1551.47355           | 0.31620               | -1551.56956           |                       |                       |
| P- <sup>6</sup> [3-F-K-IM4] <sup>2+</sup> + PPh <sub>3</sub> + PY + H <sub>2</sub> + [HNEt <sub>3</sub> ] <sup>+</sup> + CO <sub>2</sub>                              | 1.01385    | -3317.22560           | 0.72897               | -3317.51048           | -83.0                 | 9.0                   |
| P- <sup>6</sup> [3-F-K-TS2] <sup>2+</sup>                                                                                                                             | 0.41078    | -1551.45526           | 0.31351               | -1551.55253           |                       |                       |
| P- <sup>6</sup> [3-F-K-TS2] <sup>2+</sup> + PPh <sub>3</sub> + PY + H <sub>2</sub> + [HNEt <sub>3</sub> ] <sup>+</sup> + CO <sub>2</sub>                              | 1.01241    | -3317.20731           | 0.72627               | -3317.49345           | -35.0                 | 53.8                  |
| P- <sup>6</sup> [3-F-K-IM5] <sup>2+</sup>                                                                                                                             | 0.41533    | -1551.50415           | 0.31911               | -1551.60037           |                       |                       |
| P- <sup>6</sup> [3-F-K-IM5] <sup>2+</sup> + PPh <sub>3</sub> + PY + H <sub>2</sub> + [HNEt <sub>3</sub> ] <sup>+</sup> + CO <sub>2</sub>                              | 1.01697    | -3317.25620           | 0.73188               | -3317.54129           | -163.3                | -71.8                 |
| P- <sup>6</sup> [3-F-K-IM6] <sup>2+</sup>                                                                                                                             | 0.41705    | -1551.50419           | 0.32109               | -1551.60016           |                       |                       |
| P- <sup>6</sup> [3-F-K-IM6] <sup>2+</sup> + PPh <sub>3</sub> + PY + H <sub>2</sub> + [HNEt <sub>3</sub> ] <sup>+</sup> + CO <sub>2</sub>                              | 1.01869    | -3317.25624           | 0.73385               | -3317.54108           | -163.4                | -71.3                 |
| P- <sup>6</sup> [3-F-K-TS3] <sup>2+</sup>                                                                                                                             | 0.41660    | -1551.47458           | 0.32325               | -1551.56794           |                       |                       |
| P- <sup>6</sup> [3-F-K-TS3] <sup>2+</sup> + PPh <sub>3</sub> + PY + H <sub>2</sub> + [HNEt <sub>3</sub> ] <sup>+</sup> + CO <sub>2</sub>                              | 1.01824    | -3317.22664           | 0.73601               | -3317.50886           | -85.7                 | 13.3                  |
| P- <sup>6</sup> [3-F-K-IM7] <sup>2+</sup>                                                                                                                             | 0.41726    | -1551.48799           | 0.32335               | -1551.58190           |                       |                       |
| P- <sup>6</sup> [3-F-K-IM7] <sup>2+</sup> + PPh <sub>3</sub> + PY + H <sub>2</sub> + [HNEt <sub>3</sub> ] <sup>+</sup> + CO <sub>2</sub>                              | 1.01889    | -3317.24004           | 0.73611               | -3317.52282           | -120.9                | -23.3                 |
| P- <sup>6</sup> [3-F-K-IM8] <sup>2+</sup>                                                                                                                             | 0.41743    | -1551.48094           | 0.32302               | -1551.57534           |                       |                       |
| P- <sup>6</sup> [3-F-K-IM8] <sup>2+</sup> + PPh <sub>3</sub> + PY + H <sub>2</sub> + [HNEt <sub>3</sub> ] <sup>+</sup> + CO <sub>2</sub>                              | 1.01906    | -3317.23299           | 0.73579               | -3317.51626           | -102.4                | -6.1                  |
| P- <sup>6</sup> [3-F-K-TS4] <sup>2+</sup>                                                                                                                             | 0.41526    | -1551.47375           | 0.32205               | -1551.56696           |                       |                       |
| P- <sup>6</sup> [3-F-K-TS4] <sup>2+</sup> + PPh <sub>3</sub> + PY + H <sub>2</sub> + [HNEt <sub>3</sub> ] <sup>+</sup> + CO <sub>2</sub>                              | 1.01689    | -3317.22581           | 0.73481               | -3317.50788           | -83.5                 | 15.9                  |
| P- <sup>6</sup> [3-F-K-IM9] <sup>2+</sup>                                                                                                                             | 0.41486    | -1551.50210           | 0.31710               | -1551.59987           |                       |                       |
| P- <sup>6</sup> [3-F-K-IM9] <sup>2+</sup> + PPh <sub>3</sub> + PY + H <sub>2</sub> + [HNEt <sub>3</sub> ] <sup>+</sup> + CO <sub>2</sub>                              | 1.01650    | -3317.25416           | 0.72986               | -3317.54079           | -158.0                | -70.5                 |
| P- <sup>6</sup> [RuOH] <sup>2+</sup>                                                                                                                                  | 0.28700    | -1205.91067           | 0.20511               | -1205.99256           |                       |                       |
| P- <sup>6</sup> [RuOH] <sup>2+</sup> + PPh <sub>3</sub> + PY + H <sub>2</sub> + [HNEt <sub>3</sub> ] <sup>+</sup> + CO <sub>2</sub> + GVL                             | 1.01383    | -3317.23970           | 0.70179               | -3317.55174           | -120.0                | -99.3                 |
| P- <sup>6</sup> [4-F-C-IM11] <sup>2+</sup>                                                                                                                            | 0.30034    | -1394.46490           | 0.20993               | -1394.55531           |                       |                       |
| P- <sup>6</sup> [4-F-C-IM11] <sup>2+</sup> + PPh <sub>3</sub> + PY + H <sub>2</sub> + [HNEt <sub>3</sub> ] <sup>+</sup> + GVL                                         | 1.01536    | -3317.24994           | 0.72011               | -3317.54520           | -146.9                | -82.1                 |
| P- <sup>6</sup> [4-F-C-TS5] <sup>2+</sup>                                                                                                                             | 0.30027    | -1394.44970           | 0.21361               | -1394.53637           |                       |                       |
| P- <sup>6</sup> [4-F-C-TS5] <sup>2+</sup> + PPh <sub>3</sub> + PY + H <sub>2</sub> + [HNEt <sub>3</sub> ] <sup>+</sup> + GVL                                          | 1.01530    | -3317.23475           | 0.72379               | -3317.52625           | -107.0                | -32.3                 |
| P- <sup>6</sup> [4-F-C-IM12] <sup>2+</sup>                                                                                                                            | 0.30417    | -1394.46484           | 0.22076               | -1394.54824           |                       |                       |
| P- <sup>6</sup> [4-F-C-IM12] <sup>2+</sup> + PPh <sub>3</sub> + PY + H <sub>2</sub> + [HNEt <sub>3</sub> ] <sup>+</sup> + GVL                                         | 1.01920    | -3317.24988           | 0.73094               | -3317.53813           | -146.7                | -63.5                 |
| HCO <sub>3</sub> <sup>-</sup>                                                                                                                                         | 0.02645    | -264.51134            | -0.00655              | -264.54433            |                       |                       |
| HCO <sub>3</sub> <sup>-</sup> + <sup>6</sup> [Ru(PPh <sub>3</sub> )] <sup>3+</sup> + PPh <sub>3</sub> + PY + H <sub>2</sub> + [HNEt <sub>3</sub> ] <sup>+</sup> + GVL | 1.01562    | -3317.22117           | 0.70007               | -3317.53672           | -71.4                 | -59.8                 |
